# Supplementary material for: Characterization of the complete chloroplast genome sequences of six Dalbergia species and its comparative analysis in the subfamily of Papilionoideae (Fabaceae)
Source: PeerJ. 2022 Jul 1;10:e13570. doi: 10.7717/peerj.13570 (PMC9252178; doi:10.7717/peerj.13570)
Supplement: Supplemental Information 1 [file peerj-10-13570-s001.xlsx]

## Sheet: TableS1
Table S1 Primer information for PCR-based verification of the cp genome
Number	Forward primer	Reverse primer	Purification way	TM（℃）
HT-LSC-IRB	CCTCGGAAGTTTAGAGTAGGTGAA	GCTAGGTAAGCGTCCTGTAGTAAGA	PAGE	59
HT-IRB-SSC	ACCGAGAAGAAACTATCAGCAAC	TCGTGGTTACATAGACGCTTTT	PAGE	59
HT-SSC-IRA	GAAACGGTGTTCTGCCTAAATAG	AACTGTCATAGCTCTACCCTATCTT	PAGE	58
HT-IRA-LSC	CTAGGTAAGCGTCCTGTAGTAAGAG	TGTAGCCAAGTGGATCAAGCA	PAGE	58
DYHT-LSC-IRB	TGTCCTCGGAAGTTTAGAGT	AGGTAAGCGTCCTGTAGTAA	PAGE	55
DYHT-IRB-SSC	AACTGTCATAGCTCTACCCT	AATCGTGGTTACATAGACGC	PAGE	55
DYHT-SSC-IRA	AAAGGGAAACGGTGTTCTGC	TATGCGCCTTTGCATCTAGC	PAGE	58
DYHT-IRA-LSC	TAGGTAAGCGTCCTGTAGTAAGAG	GCAGATTTTTATTAAGGGCGG	PAGE	58
XBT-LSC-IRB	CGCCCAATTTATGGCCTACC	ACTCCTTGGGGTTATCCTGC	PAGE	58
XBT-IRB-SSC	GAAGGGACCGAGAAGAAACTATC	TAAAATATGTGGGAGGTGGACG	PAGE	58
XBT-SSC-IRA	CTTGCTTAGTTCCTGTTGTTTCG	CATCTAGCATTGGGTAGACCTCATA	PAGE	58
XBT-IRA-LSC	TAGGTAAGCGTCCTGTAGTAAGAG	CCCATTCTATCTTAGGAAACGAG	PAGE	58
YDHT-LSC-IRB	CCTCGGAAGTTTAGAGTAGGTGAA	GCGTCCTGTAGTAAGAGGAGTAGTT	PAGE	58
YDHT-IRB-SSC	ACCGAGAAGAAACTATCAGCAAC	GATGGAATTCCAAATGGAGTTG	PAGE	58
YDHT-SSC-IRA	GGAAACGGTGTTCTCCCTAAATA	CATCTAGCATTGGGTAGACCTCATA	PAGE	59
YDHT-IRA-LSC	TAGGTAAGCGTCCTGTAGTAAGAG	ACCCCATTCTATCTTAGGAAACG	PAGE	58
THT-LSC-IRB	GTACCAAGTCGGAAACCAAGC	GGCTAGGTAAGCGTCCTGTAGTA	PAGE	58
THT-IRB-SSC	AACTGCTGGGTTTATTACGG	ATAATCGTGGTTACATAGACGC	PAGE	55
THT-SSC-IRA	GGAAAGGGTGTTCTGCCTAAAT	ATCTAGCATTGGGTAGACCTCAT	PAGE	56
THT-IRA-LSC	TAGGTAAGCGTCCTGTAGTAAGA	GTACCCCATTCTATCTTAGGAAAC	PAGE	56
NLHT-LSC-IRB	CGCATGTCCTCGGAAGTTTA	CTAGGTAAGCGTCCTGTAGTAAGAG	PAGE	58
NLHT-IRB-SSC	AAGAAGGGACCGAGAAGAAACTAT	GCAAGTGTAAGAAAATTAGCCAAAC	PAGE	57
NLHT-SSC-IRA	GAAACGGTGTTCTGCCTAAATAG	ATCTAGCATTGGGTAGACCTCAT	PAGE	57
NLHT-IRA-LSC	AGGAGTAGTTATGAACCCTGTAGAT	GTATCCCATCCTATCTTATCTTAGG	PAGE	57

## Sheet: TableS2
Table S2-1. Codon-anticodon recognition patterns and codon usage of D. obtusifolia cp genome.RSCU = relative synonymous codon usage.
Amino	Acid Codon Codon	Frequency RSCU AA Codon Codon	Frequency RSCU	Amino	Acid Codon Codon	Frequency RSCU AA Codon Codon	Frequency RSCU
Phe	UUU*	980	1.26	Tyr	UAU*	741	1.56
	UUC	572	0.74		UAC	209	0.44
Leu	UUA*	864	1.88	TER	UAA*	211	1.15
	UUG	564	1.23		UAG	141	0.77
	CUU	528	1.15	His	CAU*	440	1.47
	CUC	207	0.45		CAC	159	0.53
	CUA	410	0.89	Gln	CAA*	671	1.56
	CUG	188	0.41		CAG	189	0.44
Ile	AUU*	1115	1.34	Asn	AAU*	877	1.51
	AUC	569	0.68		AAC	282	0.49
	AUA	820	0.98	Lys	AAA*	1100	1.49
Met	AUG	670	1		AAG	378	0.51
Val	GUU*	520	1.47	Asp	GAU*	695	1.61
	GUC	162	0.46		GAC	169	0.39
	GUA	536	1.52	Glu	GAA*	850	1.5
	GUG	195	0.55		GAG	287	0.5
Ser	UCU*	536	1.69	Cys	UGU*	251	1.44
	UCC	300	0.95		UGC	97	0.56
	UCA	386	1.22	TER	UGA	199	1.08
	UCG	207	0.65	Trp	UGG	446	1
Pro	CCU*	388	1.47	Arg	CGU	296	1.15
	CCC	202	0.77		CGC	94	0.36
	CCA	321	1.22		CGA*	349	1.35
	CCG	143	0.54		CGG	126	0.49
Thr	ACU*	491	1.57	Ser	AGU*	336	1.06
	ACC	218	0.7		AGC	137	0.43
	ACA	410	1.31	Arg	AGA*	501	1.94
	ACG	129	0.41		AGG	184	0.71
Ala	GCU*	556	1.72	Gly	GGU	574	1.3
	GCC	221	0.68		GGC	180	0.41
	GCA	378	1.17		GGA*	685	1.55
	GCG	137	0.42		GGG	331	0.75
Table S2-2. Codon-anticodon recognition patterns and codon usage of D. mimosoides cp genome.RSCU = relative synonymous codon usage.
Amino	Acid Codon Codon	Frequency RSCU AA Codon Codon	Frequency RSCU	Amino	Acid Codon Codon	Frequency RSCU AA Codon Codon	Frequency RSCU
Phe	UUU*	1165	1.31	Tyr	UAU*	878	1.37
	UUC	607	0.69		UAC	402	0.63
Leu	UUA*	616	1.7	TER	UAA*	509	1.1
	UUG	466	1.28		UAG	319	0.69
	CUU	463	1.28	His	CAU*	377	1.43
	CUC	200	0.55		CAC	152	0.57
	CUA	287	0.79	Gln	CAA*	465	1.47
	CUG	146	0.4		CAG	169	0.53
Ile	AUU*	1022	1.42	Asn	AAU*	954	1.39
	AUC	598	0.83		AAC	416	0.61
	AUA	538	0.75	Lys	AAA*	1051	1.4
Met	AUG	455	1		AAG	447	0.6
Val	GUU*	375	1.68	Asp	GAU*	543	1.51
	GUC	139	0.62		GAC	175	0.49
	GUA	252	1.13	Glu	GAA*	638	1.49
	GUG	127	0.57		GAG	217	0.51
Ser	UCU	553	1.2	Cys	UGU*	454	1.08
	UCC	442	0.96		UGC	385	0.92
	UCA*	617	1.33	TER	UGA	558	1.21
	UCG	383	0.83	Trp	UGG	577	1
Pro	CCU*	238	1.19	Arg	CGU	138	0.46
	CCC	161	0.8		CGC	118	0.39
	CCA	262	1.31		CGA*	298	0.99
	CCG	141	0.7		CGG	208	0.69
Thr	ACU	383	1.15	Ser	AGU*	429	0.93
	ACC	274	0.82		AGC	351	0.76
	ACA*	438	1.32	Arg	AGA*	644	2.15
	ACG	236	0.71		AGG	391	1.31
Ala	GCU*	241	1.26	Gly	GGU	337	0.9
	GCC	164	0.86		GGC	236	0.63
	GCA	240	1.25		GGA*	530	1.42
	GCG	122	0.64		GGG	390	1.04
Table S2-3. Codon-anticodon recognition patterns and codon usage of D. hupeana cp genome.RSCU = relative synonymous codon usage.
Amino	Acid Codon Codon	Frequency RSCU AA Codon Codon	Frequency RSCU	Amino	Acid Codon Codon	Frequency RSCU AA Codon Codon	Frequency RSCU
Phe	UUU*	991	1.31	Tyr	UAU*	757	1.62
	UUC	519	0.69		UAC	175	0.38
Leu	UUA*	840	1.87	TER	UAA*	56	2
	UUG	576	1.28		UAG	15	0.54
	CUU	560	1.24	His	CAU*	467	1.59
	CUC	176	0.39		CAC	122	0.41
	CUA	374	0.83	Gln	CAA*	720	1.58
	CUG	175	0.39		CAG	194	0.42
Ile	AUU*	1092	1.44	Asn	AAU*	993	1.56
	AUC	419	0.55		AAC	281	0.44
	AUA	761	1	Lys	AAA*	1084	1.51
Met	AUG	604	1		AAG	348	0.49
Val	GUU*	492	1.47	Asp	GAU*	826	1.64
	GUC	152	0.45		GAC	183	0.36
	GUA	508	1.52	Glu	GAA*	966	1.46
	GUG	185	0.55		GAG	356	0.54
Ser	UCU*	544	1.7	Cys	UGU*	232	1.5
	UCC	320	1		UGC	78	0.5
	UCA	376	1.17	TER	UGA	13	0.46
	UCG	197	0.61	Trp	UGG	440	1
Pro	CCU*	397	1.52	Arg	CGU	334	1.31
	CCC	204	0.78		CGC	89	0.35
	CCA	300	1.15		CGA*	364	1.43
	CCG	144	0.55		CGG	104	0.41
Thr	ACU*	529	1.65	Ser	AGU*	366	1.14
	ACC	230	0.72		AGC	121	0.38
	ACA	390	1.22	Arg	AGA*	464	1.83
	ACG	133	0.41		AGG	169	0.67
Ala	GCU*	613	1.82	Gly	GGU	574	1.32
	GCC	220	0.65		GGC	165	0.38
	GCA	369	1.09		GGA*	696	1.6
	GCG	148	0.44		GGG	302	0.7
Table S2-4. Codon-anticodon recognition patterns and codon usage of D. sissoo cp genome.RSCU = relative synonymous codon usage.
Amino	Acid Codon Codon	Frequency RSCU AA Codon Codon	Frequency RSCU	Amino	Acid Codon Codon	Frequency RSCU AA Codon Codon	Frequency RSCU
Phe	UUU*	981	1.16	Tyr	UAU*	716	1.36
	UUC	704	0.84		UAC	334	0.64
Leu	UUA	717	1.27	TER	UAA*	381	1.13
	UUG*	788	1.39		UAG	382	1.13
	CUU	647	1.14	His	CAU*	362	1.36
	CUC	348	0.62		CAC	172	0.64
	CUA	511	0.9	Gln	CAA*	642	1.34
	CUG	384	0.68		CAG	319	0.66
Ile	AUU*	889	1.17	Asn	AAU*	884	1.37
	AUC	562	0.74		AAC	406	0.63
	AUA	820	1.08	Lys	AAA*	1079	1.29
Met	AUG	692	1		AAG	591	0.71
Val	GUU	450	1.21	Asp	GAU*	634	1.47
	GUC	255	0.68		GAC	230	0.53
	GUA*	475	1.28	Glu	GAA*	842	1.31
	GUG	310	0.83		GAG	439	0.69
Ser	UCU*	468	1.59	Cys	UGU*	232	1.21
	UCC	307	1.04		UGC	152	0.79
	UCA	412	1.4	TER	UGA	248	0.74
	UCG	228	0.77	Trp	UGG	496	1
Pro	CCU*	275	1.12	Arg	CGU	149	0.71
	CCC	192	0.78		CGC	71	0.34
	CCA*	277	1.12		CGA*	243	1.16
	CCG	241	0.98		CGG	179	0.86
Thr	ACU	317	1.3	Ser	AGU*	219	0.74
	ACC	184	0.75		AGC	133	0.45
	ACA*	324	1.33	Arg	AGA*	384	1.84
	ACG	153	0.63		AGG	229	1.09
Ala	GCU*	292	1.47	Gly	GGU	304	0.98
	GCC	149	0.75		GGC	155	0.5
	GCA	214	1.08		GGA*	462	1.49
	GCG	137	0.69		GGG	322	1.04
Table S2-5. Codon-anticodon recognition patterns and codon usage of D. hancei cp genome.RSCU = relative synonymous codon usage.
Amino	Acid Codon Codon	Frequency RSCU AA Codon Codon	Frequency RSCU	Amino	Acid Codon Codon	Frequency RSCU AA Codon Codon	Frequency RSCU
Phe	UUU*	1026	1.32	Tyr	UAU*	799	1.65
	UUC	523	0.68		UAC	168	0.35
Leu	UUA*	854	1.85	TER	UAA*	56	2
	UUG	601	1.3		UAG	14	0.5
	CUU	577	1.25	His	CAU*	485	1.58
	CUC	183	0.4		CAC	129	0.42
	CUA	380	0.82	Gln	CAA*	729	1.58
	CUG	176	0.38		CAG	195	0.42
Ile	AUU*	1121	1.45	Asn	AAU*	1018	1.56
	AUC	424	0.55		AAC	283	0.44
	AUA	770	1	Lys	AAA*	1104	1.51
Met	AUG	609	1		AAG	360	0.49
Val	GUU*	500	1.47	Asp	GAU*	848	1.64
	GUC	158	0.46		GAC	184	0.36
	GUA	513	1.51	Glu	GAA*	983	1.45
	GUG	190	0.56		GAG	372	0.55
Ser	UCU*	582	1.75	Cys	UGU*	236	1.5
	UCC	326	0.98		UGC	79	0.5
	UCA	402	1.21	TER	UGA	14	0.5
	UCG	190	0.57	Trp	UGG	451	1
Pro	CCU*	394	1.49	Arg	CGU	333	1.29
	CCC	219	0.83		CGC	93	0.36
	CCA	303	1.14		CGA*	367	1.42
	CCG	144	0.54		CGG	111	0.43
Thr	ACU*	533	1.65	Ser	AGU*	374	1.12
	ACC	229	0.71		AGC	125	0.38
	ACA	390	1.21	Arg	AGA*	481	1.86
	ACG	138	0.43		AGG	165	0.64
Ala	GCU*	616	1.82	Gly	GGU	578	1.32
	GCC	222	0.66		GGC	168	0.39
	GCA	375	1.11		GGA*	700	1.6
	GCG	142	0.42		GGG	299	0.69
Table S2-6. Codon-anticodon recognition patterns and codon usage of D. balansae cp genome.RSCU = relative synonymous codon usage.
Amino	Acid Codon Codon	Frequency RSCU AA Codon Codon	Frequency RSCU	Amino	Acid Codon Codon	Frequency RSCU AA Codon Codon	Frequency RSCU
Phe	UUU	UUU*	1.32	Tyr	UAU*	781	1.63
	UUC	UUC	0.68		UAC	177	0.37
Leu	UUA	UUA*	1.86	TER	UAA*	56	2
	UUG	UUG	1.28		UAG	15	0.54
	CUU	CUU	1.24	His	CAU*	481	1.59
	CUC	CUC	0.39		CAC	124	0.41
	CUA	CUA	0.83	Gln	CAA*	732	1.58
	CUG	CUG	0.39		CAG	195	0.42
Ile	AUU	AUU*	1.45	Asn	AAU*	1015	1.56
	AUC	AUC	0.56		AAC	288	0.44
	AUA	AUA	1	Lys	AAA*	1105	1.51
Met	AUG	AUG	1		AAG	357	0.49
Val	GUU	GUU*	1.47	Asp	GAU*	841	1.64
	GUC	GUC	0.46		GAC	185	0.36
	GUA	GUA	1.51	Glu	GAA*	981	1.46
	GUG	GUG	0.56		GAG	362	0.54
Ser	UCU	UCU*	1.7	Cys	UGU*	237	1.5
	UCC	UCC	1.01		UGC	79	0.5
	UCA	UCA	1.18	TER	UGA	13	0.46
	UCG	UCG	0.6	Trp	UGG	448	1
Pro	CCU	CCU*	1.51	Arg	CGU	335	1.3
	CCC	CCC	0.79		CGC	90	0.35
	CCA	CCA	1.15		CGA*	371	1.44
	CCG	CCG	0.55		CGG	110	0.43
Thr	ACU	ACU*	1.65	Ser	AGU*	371	1.13
	ACC	ACC	0.71		AGC	121	0.37
	ACA	ACA	1.22	Arg	AGA*	472	1.83
	ACG	ACG	0.41		AGG	170	0.66
Ala	GCU	GCU*	1.81	Gly	GGU	578	1.32
	GCC	GCC	0.66		GGC	168	0.38
	GCA	GCA	1.09		GGA*	701	1.61
	GCG	GCG	0.44		GGG	300	0.69

## Sheet: TableS3
Table S31. The number of SSR types detected in the cp genome of Dalbergia obtusifolia
Repeats	5	6	7	8	9	10	11	12	13	14	15	16	17	18	19	total
A	0	0	0	0	0	26	16	13	7	5	1	1	0	0	0	69
C	0	0	0	0	0	1	1	1	0	0	0	0	0	0	0	3
G	0	0	0	0	0	1	0	1	1	0	0	0	0	0	0	3
T	0	0	0	0	0	20	23	11	3	5	0	1	0	0	0	63
AT	0	8	2	1	0	0	0	0	0	0	0	0	0	0	0	11
TA	0	5	1	0	0	1	0	0	0	0	0	0	0	0	0	7
TC	0	0	1	0	0	0	0	0	0	0	0	0	0	0	0	1
ATT	1	0	0	0	0	0	0	0	0	0	0	0	0	0	0	1
Table S32. The number of SSR types detected in the cp genome of Dalbergia hupeana
Repeats	5	6	7	8	9	10	11	12	13	14	15	16	17	18	19	total
A	0	0	0	0	0	38	18	3	7	5	1	0	1	0	0	73
C	0	0	0	0	0	0	1	1	0	0	0	0	0	0	0	2
G	0	0	0	0	0	0	1	2	0	0	0	0	0	0	0	3
T	0	0	0	0	0	27	16	10	5	2	2	0	0	0	0	62
AT	0	7	3	0	0	0	0	0	0	0	0	0	0	0	0	10
TA	0	3	2	1	0	0	0	0	0	0	0	0	0	0	0	6
0
Table S33. The number of SSR types detected in the cp genome of Dalbergia balansae
Repeats	5	6	7	8	9	10	11	12	13	14	15	16	17	18	19	total
A	0	0	0	0	0	38	17	5	5	4	2	0	1	0	0	72
C	0	0	0	0	0	0	1	1	0	0	0	0	0	0	0	2
G	0	0	0	0	0	0	0	1	1	0	0	0	0	0	0	2
T	0	0	0	0	0	29	13	8	6	3	1	0	0	0	0	60
AT	0	9	2	0	0	0	0	0	0	0	0	0	0	0	0	11
TA	0	3	1	1	1	0	0	0	0	0	0	0	0	0	0	6
Table S34. The number of SSR types detected in the cp genome of Dalbergia hancei
Repeats	5	6	7	8	9	10	11	12	13	14	15	16	17	18	19	total
A	0	0	0	0	0	39	13	6	8	1	1	1	0	0	0	69
C	0	0	0	0	0	1	1	1	1	0	0	0	0	0	0	4
G	0	0	0	0	0	1	2	1	0	0	0	0	0	0	0	4
T	0	0	0	0	0	22	18	8	4	4	0	2	0	0	0	58
AT	0	8	1	1	0	0	0	0	0	0	0	0	0	0	0	10
TA	0	1	2	0	0	0	0	0	0	0	0	0	0	0	0	3
TC	0	0	0	1	0	0	0	0	0	0	0	0	0	0	0	1
Table S35. The number of SSR types detected in the cp genome of Dalbergia mimosoides
Repeats	5	6	7	8	9	10	11	12	13	14	15	16	17	18	19	total
A	0	0	0	0	0	35	23	9	8	0	1	0	0	0	1	77
C	0	0	0	0	0	1	1	1	0	0	0	0	0	0	0	3
G	0	0	0	0	0	0	3	1	0	0	0	0	0	0	0	4
T	0	0	0	0	0	22	15	6	7	5	0	1	0	0	0	56
AT	0	5	2	1	0	0	0	0	0	0	0	0	0	0	0	8
TA	0	2	0	0	0	0	0	0	0	0	0	0	0	0	0	2
TC	0	0	0	1	0	0	0	0	0	0	0	0	0	0	0	1
Table S36. The number of SSR types detected in the cp genome of Dalbergia sissoo
Repeats	5	6	7	8	9	10	11	12	13	14	15	16	17	18	19	total
A	0	0	0	0	0	31	20	14	6	4	2	1	1	2	0	81
C	0	0	0	0	0	0	3	1	0	0	0	0	0	0	0	4
G	0	0	0	0	0	0	1	1	0	0	0	0	0	0	0	2
T	0	0	0	0	0	28	23	13	4	5	2	1	0	0	1	77
AT	0	8	1	0	0	1	0	0	0	0	0	0	0	0	0	10
TA	0	1	1	0	0	0	0	0	0	0	0	0	0	0	0	2

## Sheet: TableS4
Table S4. Maximum likelihood parameter estimates for the77 genes of Dalbergia species
Gene Name	Models	Number of Parameters	Ln L	Estimates of parameters
accD	M3	46	-2717.346585	p:	0.91392	0.08408	0.00200
				ω:	0.21643	3.91814	129.38541
	M0	42	-2790.322699	ω0:	0.24531
	M2a	45	-2720.535883	p:	0.63198	0.36602	0.00200
				ω:	0.00000	1.00000	102.83171
	M1a	43	-2779.731087	p:	0.76663	0.23337
				ω:	0.01969	1.00000
	M8	45	-2720.664276	p0=0.99800	p=0.00500	q=0.01084
				(p1= 0.00200)	ω= 97.16437
	M7	43	-2780.691566	p=	0.03552	q=	0.13930
	M8a	44	-2779.752798	p0=0.75412	p=0.03352	q=1.87536
				(p1= 0.24588)	ω= 1.00000
atpA	M3	46	-2255.450232	p:	0.02560	0.24802	0.72638
				ω:	0.06299	0.06305	0.06305
	M0	42	-2255.450599	ω0:	0.06306
	M2a	45	-2255.450232	p:	1.00000	0.00000	0.00000
				ω:	0.06306	1.00000	1.00000
	M1a	43	-2255.450255	p:	0.99999	0.00001
				ω:	0.06305	1.00000
	M8	45	-2255.451233	p0=0.99999	p=6.78099	q=99.00000
				(p1= 0.00001)	ω= 1.00000
	M7	43	-2255.451210	p=	6.78177	q=	99.00000
	M8a	44	-2255.451638	p0=0.99999	p=6.70443	q=99.00000
				(p1= 0.00001)	ω= 1.00000
atpB	M3	46	-2379.304986	p:	0.97518	0.02280	0.00202
				ω:	0.11707	0.11710	197.24059
	M0	42	-2451.431898	ω0:	0.06728
	M2a	45	-2379.305441	p:	0.99798	0.00000	0.00202
				ω:	0.11706	1.00000	197.22614
	M1a	43	-2451.432069	p:	0.99999	0.00001
				ω:	0.06728	1.00000
	M8	45	-2379.310184	p0=0.99797	p=13.31603	q=99.00000
				(p1= 0.00203)	ω= 197.63188
	M7	43	-2451.441286	p=	7.26596	q=	99.00000
	M8a	44	-2451.445306	p0=0.99999	p=7.19147	q=99.00000
				(p1= 0.00001)	ω= 1.00000
atpE	M3	46	-634.579344	p:	0.89365	0.00000	0.10635
				ω:	0.00000	1.31465	4.90306
	M0	42	-638.215154	ω0:	0.39333
	M2a	45	-634.579344	p:	0.89365	0.00000	0.10635
				ω:	0.00000	1.00000	4.90302
	M1a	43	-636.143596	p:	0.71340	0.28660
				ω:	0.00000	1.00000
	M8	45	-634.579343	p0=0.89365	p=0.00500	q=0.06838
				(p1= 0.10635)	ω= 4.90306
	M7	43	-636.201007	p=	0.00833	q=	0.01353
	M8a	44	-636.143597	p0=0.71340	p=0.00500	q=2.10611
				(p1= 0.28660)	ω= 1.00000
atpF	M3	46	-911.646529	p:	0.30597	0.51080	0.18323
				ω:	0.00000	0.00000	1.65304
	M0	42	-913.763667	ω0:	0.27627
	M2a	45	-911.646529	p:	0.81677	0.00000	0.18323
				ω:	0.00000	1.00000	1.65305
	M1a	43	-912.538774	p:	0.74306	0.25694
				ω:	0.00000	1.00000
	M8	45	-911.646527	p0=0.81677	p=0.00500	q=1.70720
				(p1= 0.18323)	ω= 1.65303
	M7	43	-912.052540	p=	0.03274	q=	0.12222
	M8a	44	-911.848944	p0=0.74309	p=0.00500	q=1.68841
				(p1= 0.25691)	ω= 1.00000
atpH	M3	46	-375.468896	p:	0.00000	0.98779	0.01221
				ω:	0.00000	0.00000	999.00000
	M0	42	-434.476950	ω0:	0.00010
	M2a	45	-375.468896	p:	0.98779	0.00000	0.01221
				ω:	0.00000	1.00000	999.00000
	M1a	43	-434.468109	p:	0.99999	0.00001
				ω:	0.00000	1.00000
	M8	45	-375.468875	p0=0.98779	p=0.00500	q=1.66735
				(p1= 0.01221)	ω= 999.00000
	M7	43	-434.467525	p=	0.00500	q=	4.26089
	M8a	44	-434.468017	p0=0.99999	p=0.00500	q=99.00000
				(p1= 0.00001)	ω= 1.00000
atpI	M3	46	-1215.994084	p:	0.00000	0.99595	0.00405
				ω:	0.00000	0.07768	136.20607
	M0	42	-1273.581123	ω0:	0.03819
	M2a	45	-1215.994084	p:	0.99595	0.00000	0.00405
				ω:	0.07768	1.00000	136.20215
	M1a	43	-1273.581287	p:	0.99999	0.00001
				ω:	0.03818	1.00000
	M8	45	-1216.001351	p0=0.99595	p=2.85377	q=32.52050
				(p1= 0.00405)	ω= 136.27087
	M7	43	-1273.586863	p=	4.05522	q=	99.00000
	M8a	44	-1273.589449	p0=0.99999	p=3.97802	q=99.00000
				(p1= 0.00001)	ω= 1.00000
ccsA	M3	46	-516.109381	p:	0.24367	0.74492	0.01141
				ω:	0.00000	1.31075	38.77071
	M0	42	-520.579048	ω0:	1.01415
	M2a	45	-516.159770	p:	0.10406	0.88448	0.01145
				ω:	0.00000	1.00000	35.76925
	M1a	43	-520.082577	p:	0.30786	0.69214
				ω:	0.00000	1.00000
	M8	45	-516.193509	p0=0.98858	p=10.47982	q=0.23902
				(p1= 0.01142)	ω= 38.64744
	M7	43	-520.088006	p=	0.01796	q=	0.00926
	M8a	44	-520.082577	p0=0.30786	p=0.00500	q=2.10701
				(p1= 0.69214)	ω= 1.00000
cemA	M3	46	-1155.999965	p:	0.89628	0.09936	0.00437
				ω:	0.00000	3.10706	185.39834
	M0	42	-1222.033399	ω0:	0.10749
	M2a	45	-1157.279930	p:	0.77074	0.22490	0.00437
				ω:	0.00000	1.00000	159.74021
	M1a	43	-1217.365669	p:	0.89532	0.10468
				ω:	0.00000	1.00000
	M8	45	-1157.782999	p0=0.99563	p=0.00500	q=0.00752
				(p1= 0.00437)	ω= 188.20212
	M7	43	-1219.150432	p=	0.03994	q=	0.22693
	M8a	44	-1217.365671	p0=0.89532	p=0.00500	q=2.09649
				(p1= 0.10468)	ω= 1.00000
clpP	M3	46	-883.746261	p:	0.99483	0.00000	0.00517
				ω:	0.08886	0.54940	69.14933
	M0	42	-897.991267	ω0:	0.20221
	M2a	45	-883.746315	p:	0.99483	0.00000	0.00517
				ω:	0.08886	1.00000	69.14949
	M1a	43	-892.417368	p:	0.89701	0.10299
				ω:	0.00000	1.00000
	M8	45	-889.260891	p0=0.96988	p=0.00500	q=1.38767
				(p1= 0.03012)	ω= 7.07007
	M7	43	-894.716296	p=	0.03531	q=	0.15830
	M8a	44	-892.417373	p0=0.89701	p=0.00500	q=1.44225
				(p1= 0.10299)	ω= 1.00000
matK	M3	46	-2376.454265	p:	0.65877	0.32139	0.01983
				ω:	0.00000	1.45356	7.25920
	M0	42	-2389.055231	ω0:	0.57463
	M2a	45	-2376.572649	p:	0.59381	0.36031	0.04588
				ω:	0.00000	1.00000	5.17679
	M1a	43	-2380.370818	p:	0.59844	0.40156
				ω:	0.00000	1.00000
	M8	45	-2376.612487	p0=0.93910	p=0.05461	q=0.08471
				(p1= 0.06090)	ω= 4.52045
	M7	43	-2380.866154	p=	0.04115	q=	0.05746
	M8a	44	-2380.370814	p0=0.66493	p=0.00500	q=0.04790
				(p1= 0.33507)	ω= 1.00000
ndhA	M3	46	-1846.701120	p:	0.59715	0.36369	0.03916
				ω:	0.00000	0.56818	0.56822
	M0	42	-1847.708340	ω0:	0.23069
	M2a	45	-1846.821903	p:	0.85951	0.05441	0.08608
				ω:	0.10757	1.00000	1.00000
	M1a	43	-1846.821901	p:	0.85949	0.14051
				ω:	0.10756	1.00000
	M8	45	-1846.718919	p0=0.99999	p=0.18774	q=0.60594
				(p1= 0.00001)	ω= 2.06642
	M7	43	-1846.718693	p=	0.18768	q=	0.60572
	M8a	44	-1846.747773	p0=0.99999	p=0.25680	q=0.85649
				(p1= 0.00001)	ω= 1.00000
ndhB	M3	46	-2077.424250	p:	0.00000	0.99795	0.00205
				ω:	0.00000	0.17171	999.00000
	M0	42	-2191.984923	ω0:	1.65306
	M2a	45	-2077.424251	p:	0.99794	0.00000	0.00206
				ω:	0.17172	1.00000	999.00000
	M1a	43	-2167.138272	p:	0.99999	0.00001
				ω:	0.04417	1.00000
	M8	45	-2096.369750	p0=0.99170	p=0.00500	q=0.15525
				(p1= 0.00830)	ω= 292.98305
	M7	43	-2167.149486	p=	0.00666	q=	0.03589
	M8a	44	-2167.139432	p0=0.99999	p=4.66243	q=99.00000
				(p1= 0.00001)	ω= 1.00000
ndhC	M3	46	-594.649682	p:	0.97441	0.00000	0.02559
				ω:	0.10002	3.49601	130.62810
	M0	42	-655.409029	ω0:	0.07223
	M2a	45	-594.649682	p:	0.97441	0.00000	0.02559
				ω:	0.10002	1.00000	130.62822
	M1a	43	-647.475493	p:	0.93854	0.06146
				ω:	0.00000	1.00000
	M8	45	-594.667603	p0=0.97450	p=0.03500	q=0.20115
				(p1= 0.02550)	ω= 130.78664
	M7	43	-651.981618	p=	0.03863	q=	0.24291
	M8a	44	-647.475475	p0=0.93854	p=0.00500	q=80.57929
				(p1= 0.06146)	ω= 1.00000
ndhD	M3	46	-2681.902301	p:	0.95023	0.04776	0.00201
				ω:	0.07594	5.00211	93.84442
	M0	42	-2766.277933	ω0:	0.19660
	M2a	45	-2689.421168	p:	0.81255	0.18544	0.00201
				ω:	0.00000	1.00000	75.41432
	M1a	43	-2743.442943	p:	0.85446	0.14554
				ω:	0.00000	1.00000
	M8	45	-2693.372607	p0=0.99603	p=0.02846	q=0.11439
				(p1= 0.00397)	ω= 55.25708
	M7	43	-2750.835062	p=	0.03488	q=	0.15609
	M8a	44	-2743.442938	p0=0.85446	p=0.00500	q=2.77006
				(p1= 0.14554)	ω= 1.00000
ndhE	M3	46	-512.562569	p:	0.97945	0.01056	0.00998
				ω:	0.00000	12.12133	120.80009
	M0	42	-559.670437	ω0:	0.00883
	M2a	45	-513.218419	p:	0.98987	0.00000	0.01013
				ω:	0.02628	1.00000	114.21625
	M1a	43	-559.465957	p:	0.98410	0.01590
				ω:	0.00000	1.00000
	M8	45	-514.284542	p0=0.98032	p=0.00500	q=2.31557
				(p1= 0.01968)	ω= 81.87565
	M7	43	-559.664761	p=	0.05089	q=	1.01918
	M8a	44	-559.465937	p0=0.98410	p=0.00500	q=92.12096
				(p1= 0.01590)	ω= 1.00000
ndhF	M3	46	-3489.404508	p:	0.61825	0.36794	0.01381
				ω:	0.00000	0.80909	6.77141
	M0	42	-3520.125361	ω0:	0.36397
	M2a	45	-3489.463407	p:	0.71250	0.27530	0.01221
				ω:	0.04634	1.00000	7.09961
	M1a	43	-3497.457419	p:	0.69608	0.30392
				ω:	0.00778	1.00000
	M8	45	-3489.422379	p0=0.98669	p=0.12422	q=0.30478
				(p1= 0.01331)	ω= 6.85234
	M7	43	-3497.590288	p=	0.01164	q=	0.02698
	M8a	44	-3497.460352	p0=0.69224	p=0.02273	q=1.84698
				(p1= 0.30776)	ω= 1.00000
ndhG	M3	46	-894.490007	p:	0.94584	0.04846	0.00569
				ω:	0.26638	2.54087	170.65118
	M0	42	-950.898415	ω0:	0.12209
	M2a	45	-894.495292	p:	0.69075	0.30355	0.00569
				ω:	0.09765	1.00000	170.48722
	M1a	43	-950.607382	p:	0.96312	0.03688
				ω:	0.09106	1.00000
	M8	45	-894.495955	p0=0.99430	p=0.17311	q=0.29094
				(p1= 0.00570)	ω= 170.62821
	M7	43	-950.621749	p=	0.30897	q=	1.84343
	M8a	44	-950.607990	p0=0.96436	p=10.08631	q=99.00000
				(p1= 0.03564)	ω= 1.00000
ndhH	M3	46	-1880.053582	p:	0.05147	0.90474	0.04379
				ω:	0.03920	0.03952	1.00226
	M0	42	-1881.070673	ω0:	0.07979
	M2a	45	-1880.053582	p:	0.95614	0.02111	0.02275
				ω:	0.03947	1.00000	1.00271
	M1a	43	-1880.053582	p:	0.95603	0.04397
				ω:	0.03943	1.00000
	M8	45	-1880.054309	p0=0.96024	p=0.21452	q=3.28032
				(p1= 0.03976)	ω= 1.00000
	M7	43	-1880.268252	p=	0.04476	q=	0.28854
	M8a	44	-1880.054187	p0=0.95984	p=0.46818	q=9.83371
				(p1= 0.04016)	ω= 1.00000
ndhI	M3	46	-891.356555	p:	0.80291	0.19105	0.00604
				ω:	0.00000	1.09027	91.51049
	M0	42	-942.288040	ω0:	0.07437
	M2a	45	-891.363451	p:	0.79120	0.20276	0.00604
				ω:	0.00000	1.00000	90.40462
	M1a	43	-940.448976	p:	0.95333	0.04667
				ω:	0.03622	1.00000
	M8	45	-891.676056	p0=0.99395	p=0.02556	q=0.11811
				(p1= 0.00605)	ω= 91.48909
	M7	43	-940.669211	p=	0.04243	q=	0.27559
	M8a	44	-940.354167	p0=0.99999	p=0.09389	q=1.05527
				(p1= 0.00001)	ω= 1.00000
ndhJ	M3	46	-832.406510	p:	0.05149	0.94219	0.00631
				ω:	0.06861	0.06862	112.61548
	M0	42	-883.726905	ω0:	0.02851
	M2a	45	-832.406510	p:	0.99369	0.00000	0.00631
				ω:	0.06862	1.00000	112.61413
	M1a	43	-883.727115	p:	0.99999	0.00001
				ω:	0.02850	1.00000
	M8	45	-832.408602	p0=0.99369	p=7.41886	q=99.00000
				(p1= 0.00631)	ω= 112.64315
	M7	43	-883.733952	p=	3.03079	q=	99.00000
	M8a	44	-883.737182	p0=0.99999	p=2.95445	q=99.00000
				(p1= 0.00001)	ω= 1.00000
ndhK	M3	46	-1095.106830	p:	0.81516	0.18015	0.00469
				ω:	0.00000	0.96203	118.26988
	M0	42	-1151.510037	ω0:	0.07041
	M2a	45	-1095.107581	p:	0.82072	0.17459	0.00469
				ω:	0.00000	1.00000	118.58991
	M1a	43	-1150.746677	p:	0.96113	0.03887
				ω:	0.03695	1.00000
	M8	45	-1095.282451	p0=0.99531	p=0.03203	q=0.15547
				(p1= 0.00469)	ω= 118.11161
	M7	43	-1150.731639	p=	0.04306	q=	0.28815
	M8a	44	-1150.596209	p0=0.99999	p=0.09559	q=1.15927
				(p1= 0.00001)	ω= 1.00000
petA	M3	46	-1630.615118	p:	0.80698	0.18989	0.00313
				ω:	0.00000	0.75513	132.92158
	M0	42	-1692.827486	ω0:	0.07351
	M2a	45	-1630.633081	p:	0.87683	0.12004	0.00313
				ω:	0.02861	1.00000	133.35896
	M1a	43	-1691.961681	p:	0.96160	0.03840
				ω:	0.04037	1.00000
	M8	45	-1630.766686	p0=0.99697	p=0.00500	q=0.02522
				(p1= 0.00303)	ω= 133.01754
	M7	43	-1692.051034	p=	0.05115	q=	0.34957
	M8a	44	-1691.905062	p0=0.99999	p=0.09769	q=1.12002
				(p1= 0.00001)	ω= 1.00000
petB	M3	46	-999.882161	p:	0.98827	0.00707	0.00465
				ω:	0.02178	9.51012	214.76809
	M0	42	-1061.471426	ω0:	0.02741
	M2a	45	-1000.601023	p:	0.94228	0.05307	0.00465
				ω:	0.00000	1.00000	202.54068
	M1a	43	-1058.307544	p:	0.97543	0.02457
				ω:	0.00000	1.00000
	M8	45	-1002.104915	p0=0.99534	p=0.00542	q=0.02817
				(p1= 0.00466)	ω= 214.87460
	M7	43	-1060.388486	p=	0.03935	q=	0.35649
	M8a	44	-1058.307537	p0=0.97543	p=0.00500	q=4.34273
				(p1= 0.02457)	ω= 1.00000
petD	M3	46	-788.131672	p:	0.97800	0.01577	0.00623
				ω:	0.12362	0.12366	251.54610
	M0	42	-847.221236	ω0:	0.04532
	M2a	45	-788.131672	p:	0.99377	0.00000	0.00623
				ω:	0.12362	1.00000	251.54281
	M1a	43	-847.221399	p:	0.99999	0.00001
				ω:	0.04531	1.00000
	M8	45	-788.133742	p0=0.99377	p=14.07272	q=99.00000
				(p1= 0.00623)	ω= 251.68138
	M7	43	-847.228603	p=	4.82885	q=	99.00000
	M8a	44	-847.231838	p0=0.99999	p=4.75439	q=99.00000
				(p1= 0.00001)	ω= 1.00000
petG	M3	46	-228.726853	p:	0.96810	0.00556	0.02634
				ω:	0.07330	0.07330	139.57253
	M0	42	-267.634146	ω0:	0.01510
	M2a	45	-228.726853	p:	0.97366	0.00000	0.02634
				ω:	0.07330	1.00000	139.57273
	M1a	43	-267.634387	p:	0.99999	0.00001
				ω:	0.01510	1.00000
	M8	45	-228.728914	p0=0.97366	p=7.96143	q=99.00000
				(p1= 0.02634)	ω= 139.62444
	M7	43	-267.643952	p=	1.64072	q=	99.00000
	M8a	44	-267.648645	p0=0.99999	p=1.56658	q=99.00000
				(p1= 0.00001)	ω= 1.00000
petL	M3	46	-172.519411	p:	0.96866	0.00000	0.03134
				ω:	1.51338	42.27649	999.00000
	M0	42	-231.262700	ω0:	999.00000
	M2a	45	-172.629567	p:	0.00001	0.96867	0.03132
				ω:	0.00000	1.00000	999.00000
	M1a	43	-217.692021	p:	0.99999	0.00001
				ω:	0.05018	1.00000
	M8	45	-172.629562	p0=0.96868	p=40.89200	q=0.00500
				(p1= 0.03132)	ω= 999.00000
	M7	43	-217.702856	p=	5.39302	q=	99.00000
	M8a	44	-217.707389	p0=0.99999	p=5.33307	q=99.00000
				(p1= 0.00001)	ω= 1.00000
petN	M3	46	-130.575176	p:	0.94655	0.02008	0.03337
				ω:	0.00000	0.00000	999.00000
	M0	42	-201.193985	ω0:	999.00000
	M2a	45	-130.575176	p:	0.96663	0.00000	0.03337
				ω:	0.00000	1.00000	999.00000
	M1a	43	-170.699004	p:	0.99999	0.00001
				ω:	0.00000	1.00000
	M8	45	-130.575174	p0=0.96663	p=0.00500	q=2.30135
				(p1= 0.03337)	ω= 999.00000
	M7	43	-170.698662	p=	0.00500	q=	1.78351
	M8a	44	-170.698914	p0=0.99999	p=0.00500	q=99.00000
				(p1= 0.00001)	ω= 1.00000
psaA	M3	46	-3497.808350	p:	0.08867	0.90865	0.00268
				ω:	0.01816	0.02874	73.25079
	M0	42	-3565.434017	ω0:	0.03178
	M2a	45	-3494.382385	p:	0.96194	0.03672	0.00134
				ω:	0.00000	1.00000	134.12425
	M1a	43	-3558.684227	p:	0.97384	0.02616
				ω:	0.00000	1.00000
	M8	45	-3497.811392	p0=0.99733	p=0.16636	q=3.52507
				(p1= 0.00267)	ω= 73.58209
	M7	43	-3563.246297	p=	0.04775	q=	0.45604
	M8a	44	-3558.684234	p0=0.97384	p=0.00500	q=1.96492
				(p1= 0.02616)	ω= 1.00000
psaB	M3	46	-3510.480677	p:	0.97961	0.01891	0.00148
				ω:	0.00000	3.42980	91.15217
	M0	42	-3582.095389	ω0:	0.04293
	M2a	45	-3511.551589	p:	0.95607	0.04133	0.00261
				ω:	0.00000	1.00000	67.88729
	M1a	43	-3569.920213	p:	0.96563	0.03437
				ω:	0.00000	1.00000
	M8	45	-3515.015299	p0=0.99727	p=0.03063	q=0.21254
				(p1= 0.00273)	ω= 68.13962
	M7	43	-3577.728010	p=	0.03701	q=	0.27897
	M8a	44	-3569.920170	p0=0.96563	p=0.00500	q=4.59230
				(p1= 0.03437)	ω= 1.00000
psaC	M3	46	-378.169543	p:	0.00000	0.98779	0.01221
				ω:	0.00000	0.00000	999.00000
	M0	42	-474.621877	ω0:	1.70819
	M2a	45	-378.169543	p:	0.98779	0.00000	0.01221
				ω:	0.00000	1.00000	999.00000
	M1a	43	-439.928427	p:	0.99999	0.00001
				ω:	0.00000	1.00000
	M8	45	-378.169529	p0=0.98779	p=0.00500	q=1.87447
				(p1= 0.01221)	ω= 999.00000
	M7	43	-439.927884	p=	0.00500	q=	4.45665
	M8a	44	-439.928352	p0=0.99999	p=0.00500	q=44.41718
				(p1= 0.00001)	ω= 1.00000
psaI	M3	46	-189.473163	p:	0.89897	0.07227	0.02875
				ω:	0.00000	34.37275	701.77916
	M0	42	-250.676938	ω0:	9.58966
	M2a	45	-190.075284	p:	0.97116	0.00000	0.02884
				ω:	0.87300	1.00000	640.37970
	M1a	43	-233.802671	p:	0.92108	0.07892
				ω:	0.00000	1.00000
	M8	45	-194.472598	p0=0.91308	p=0.00500	q=2.61368
				(p1= 0.08692)	ω= 249.46759
	M7	43	-233.916140	p=	0.04617	q=	0.39841
	M8a	44	-233.802669	p0=0.92108	p=0.00500	q=5.81224
				(p1= 0.07892)	ω= 1.00000
psaJ	M3	46	-250.406838	p:	0.00004	0.97768	0.02227
				ω:	0.00000	0.10470	999.00000
	M0	42	-321.179676	ω0:	2.22845
	M2a	45	-250.406765	p:	0.97773	0.00000	0.02227
				ω:	0.10456	1.00000	979.77938
	M1a	43	-299.799386	p:	0.96333	0.03667
				ω:	0.00000	1.00000
	M8	45	-253.284764	p0=0.95552	p=0.00500	q=2.22786
				(p1= 0.04448)	ω= 144.56812
	M7	43	-300.059405	p=	0.04678	q=	0.51925
	M8a	44	-299.799375	p0=0.96332	p=0.00500	q=99.00000
				(p1= 0.03668)	ω= 1.00000
psbA	M3	46	-1576.102013	p:	0.00000	0.99716	0.00284
				ω:	0.00000	0.02098	345.68088
	M0	42	-1646.917095	ω0:	0.00872
	M2a	45	-1576.102013	p:	0.99716	0.00000	0.00284
				ω:	0.02098	1.00000	345.66815
	M1a	43	-1646.917159	p:	0.99999	0.00001
				ω:	0.00871	1.00000
	M8	45	-1576.103397	p0=0.99714	p=0.02605	q=0.20579
				(p1= 0.00286)	ω= 345.72678
	M7	43	-1646.918224	p=	0.06548	q=	1.86296
	M8a	44	-1646.917948	p0=0.99999	p=0.53638	q=57.42576
				(p1= 0.00001)	ω= 1.00000
psbB	M3	46	-2307.042664	p:	0.00000	0.99617	0.00383
				ω:	0.00000	0.04084	222.95804
	M0	42	-2382.476082	ω0:	0.03602
	M2a	45	-2307.042664	p:	0.99617	0.00000	0.00383
				ω:	0.04083	1.00000	222.97435
	M1a	43	-2379.655799	p:	0.96616	0.03384
				ω:	0.00000	1.00000
	M8	45	-2306.906597	p0=0.99678	p=0.04914	q=0.39755
				(p1= 0.00322)	ω= 251.65757
	M7	43	-2381.411208	p=	0.02526	q=	0.17485
	M8a	44	-2379.655798	p0=0.96616	p=0.00500	q=2.77801
				(p1= 0.03384)	ω= 1.00000
psbC	M3	46	-2227.961392	p:	0.97120	0.02668	0.00212
				ω:	0.00000	2.17649	141.13232
	M0	42	-2295.013492	ω0:	0.03271
	M2a	45	-2230.748589	p:	0.99788	0.00000	0.00212
				ω:	0.05847	1.00000	141.36057
	M1a	43	-2292.204269	p:	0.96871	0.03129
				ω:	0.00000	1.00000
	M8	45	-2252.030367	p0=0.98907	p=0.00500	q=1.24643
				(p1= 0.01093)	ω= 25.73756
	M7	43	-2293.950845	p=	0.04515	q=	0.41352
	M8a	44	-2292.204272	p0=0.96871	p=0.00500	q=2.06522
				(p1= 0.03129)	ω= 1.00000
psbD	M3	46	-1594.157207	p:	0.16101	0.83614	0.00285
				ω:	0.00000	0.00000	205.58750
	M0	42	-1658.663357	ω0:	0.00010
	M2a	45	-1594.157623	p:	0.99714	0.00000	0.00286
				ω:	0.00000	1.00000	208.17727
	M1a	43	-1658.652952	p:	0.99999	0.00001
				ω:	0.00000	1.00000
	M8	45	-1594.157172	p0=0.99714	p=0.00500	q=1.96236
				(p1= 0.00286)	ω= 205.58822
	M7	43	-1658.651888	p=	0.00500	q=	3.01244
	M8a	44	-1658.652876	p0=0.99999	p=0.00500	q=6.23963
				(p1= 0.00001)	ω= 1.00000
psbE	M3	46	-391.466796	p:	0.98787	0.00021	0.01192
				ω:	0.00000	0.00000	999.00000
	M0	42	-482.198201	ω0:	2.11940
	M2a	45	-391.466796	p:	0.98808	0.00000	0.01192
				ω:	0.00000	1.00000	999.00000
	M1a	43	-451.100245	p:	0.99999	0.00001
				ω:	0.00000	1.00000
	M8	45	-391.467250	p0=0.98808	p=0.00500	q=0.89733
				(p1= 0.01192)	ω= 999.00000
	M7	43	-451.099762	p=	0.00500	q=	2.08214
	M8a	44	-451.100182	p0=0.99999	p=0.00500	q=99.00000
				(p1= 0.00001)	ω= 1.00000
psbF	M3	46	-215.557074	p:	0.90799	0.06760	0.02441
				ω:	0.10841	5.95675	702.43463
	M0	42	-264.911786	ω0:	999.00000
	M2a	45	-216.048715	p:	0.68788	0.28771	0.02441
				ω:	0.00000	1.00000	509.12645
	M1a	43	-245.996321	p:	0.99999	0.00001
				ω:	0.00000	1.00000
	M8	45	-216.059282	p0=0.97559	p=0.00500	q=0.01471
				(p1= 0.02441)	ω= 535.93418
	M7	43	-262.739939	p=	0.04001	q=	0.31086
	M8a	44	-262.407119	p0=0.99999	p=0.05191	q=1.05324
				(p1= 0.00001)	ω= 1.00000
psbH	M3	46	-388.717218	p:	0.00011	0.98636	0.01353
				ω:	0.06246	0.06260	115.03787
	M0	42	-429.766442	ω0:	0.01549
	M2a	45	-388.717218	p:	0.98647	0.00000	0.01353
				ω:	0.06260	1.00000	115.03825
	M1a	43	-429.766898	p:	0.99999	0.00001
				ω:	0.01549	1.00000
	M8	45	-388.721780	p0=0.98646	p=6.74352	q=99.00000
				(p1= 0.01354)	ω= 115.12301
	M7	43	-429.784686	p=	1.68161	q=	99.00000
	M8a	44	-429.793396	p0=0.99999	p=1.60776	q=99.00000
				(p1= 0.00001)	ω= 1.00000
psbI	M3	46	-180.183089	p:	0.00000	0.97297	0.02703
				ω:	0.00000	0.00000	999.00000
	M0	42	-254.700836	ω0:	3.29257
	M2a	45	-180.183089	p:	0.97297	0.00000	0.02703
				ω:	0.00000	1.00000	999.00000
	M1a	43	-227.979448	p:	0.99999	0.00001
				ω:	0.00000	1.00000
	M8	45	-180.183081	p0=0.97297	p=0.00500	q=1.66170
				(p1= 0.02703)	ω= 999.00000
	M7	43	-227.979134	p=	0.00500	q=	2.72862
	M8a	44	-227.979401	p0=0.99999	p=0.00500	q=99.00000
				(p1= 0.00001)	ω= 1.00000
psbJ	M3	46	-215.557074	p:	0.90799	0.06760	0.02441
				ω:	0.10841	5.95675	702.43658
	M0	42	-285.128752	ω0:	3.99577
	M2a	45	-216.856051	p:	0.97559	0.00000	0.02441
				ω:	0.50913	1.00000	671.19808
	M1a	43	-262.640292	p:	0.96341	0.03659
				ω:	0.01491	1.00000
	M8	45	-216.059282	p0=0.97559	p=0.01196	q=0.02492
				(p1= 0.02441)	ω= 535.93217
	M7	43	-262.739940	p=	0.04031	q=	0.31406
	M8a	44	-262.407119	p0=0.99999	p=0.05191	q=1.05325
				(p1= 0.00001)	ω= 1.00000
psbK	M3	46	-275.305118	p:	0.90553	0.07724	0.01723
				ω:	0.00000	3.54221	54.17341
	M0	42	-290.086453	ω0:	0.78886
	M2a	45	-275.762348	p:	0.81983	0.16291	0.01726
				ω:	0.00000	1.00000	40.51373
	M1a	43	-283.703871	p:	0.87387	0.12613
				ω:	0.00000	1.00000
	M8	45	-277.920155	p0=0.93837	p=0.00500	q=1.33029
				(p1= 0.06163)	ω= 14.14385
	M7	43	-285.134609	p=	0.00961	q=	0.01828
	M8a	44	-283.703901	p0=0.87387	p=0.00500	q=99.00000
				(p1= 0.12613)	ω= 1.00000
psbL	M3	46	-172.571975	p:	0.97415	0.00000	0.02585
				ω:	0.00000	0.00000	999.00000
	M0	42	-239.857257	ω0:	999.00000
	M2a	45	-172.571975	p:	0.97415	0.00000	0.02585
				ω:	0.00000	1.00000	999.00000
	M1a	43	-226.726131	p:	0.99999	0.00001
				ω:	0.00000	1.00000
	M8	45	-172.571974	p0=0.97415	p=0.00500	q=1.30872
				(p1= 0.02585)	ω= 999.00000
	M7	43	-226.725872	p=	0.00500	q=	2.43429
	M8a	44	-226.726095	p0=0.99999	p=0.00500	q=99.00000
				(p1= 0.00001)	ω= 1.00000
psbM	M3	46	-171.205206	p:	0.97141	0.00000	0.02859
				ω:	0.00000	4.55829	999.00000
	M0	42	-252.092401	ω0:	2.00973
	M2a	45	-171.205206	p:	0.97141	0.00000	0.02859
				ω:	0.00000	1.00000	999.00000
	M1a	43	-208.055636	p:	0.99999	0.00001
				ω:	0.00000	1.00000
	M8	45	-171.205195	p0=0.97141	p=0.00500	q=1.64260
				(p1= 0.02859)	ω= 999.00000
	M7	43	-208.055211	p=	0.00500	q=	1.91937
	M8a	44	-208.055509	p0=0.99999	p=0.00500	q=99.00000
				(p1= 0.00001)	ω= 1.00000
psbN	M3	46	-211.267450	p:	0.00000	0.97726	0.02274
				ω:	0.00000	0.00000	999.00000
	M0	42	-287.662977	ω0:	7.57371
	M2a	45	-211.267450	p:	0.97726	0.00000	0.02274
				ω:	0.00000	1.00000	999.00000
	M1a	43	-260.908099	p:	0.99999	0.00001
				ω:	0.00000	1.00000
	M8	45	-211.267446	p0=0.97726	p=0.00500	q=1.81594
				(p1= 0.02274)	ω= 999.00000
	M7	43	-260.907732	p=	0.00500	q=	3.24734
	M8a	44	-260.908038	p0=0.99999	p=0.00500	q=99.00000
				(p1= 0.00001)	ω= 1.00000
psbT	M3	46	-163.919505	p:	0.97220	0.00000	0.02780
				ω:	0.00000	0.00000	999.00000
	M0	42	-242.343424	ω0:	10.47765
	M2a	45	-163.919505	p:	0.97220	0.00000	0.02780
				ω:	0.00000	1.00000	999.00000
	M1a	43	-222.697215	p:	0.99999	0.00001
				ω:	0.00000	1.00000
	M8	45	-163.919502	p0=0.97220	p=0.00500	q=1.19354
				(p1= 0.02780)	ω= 999.00000
	M7	43	-222.696934	p=	0.00500	q=	2.28484
	M8a	44	-222.697170	p0=0.99999	p=0.00500	q=99.00000
				(p1= 0.00001)	ω= 1.00000
psbZ	M3	46	-299.042104	p:	0.94803	0.03604	0.01593
				ω:	0.00000	2.24217	290.82057
	M0	42	-340.724819	ω0:	0.00996
	M2a	45	-299.104635	p:	0.98407	0.00000	0.01593
				ω:	0.05232	1.00000	287.88220
	M1a	43	-340.724872	p:	0.99999	0.00001
				ω:	0.00996	1.00000
	M8	45	-299.098183	p0=0.98406	p=0.05042	q=0.39345
				(p1= 0.01594)	ω= 288.05945
	M7	43	-340.721656	p=	0.05380	q=	1.06362
	M8a	44	-340.712248	p0=0.99999	p=0.01443	q=0.48585
				(p1= 0.00001)	ω= 1.00000
rbcL	M3	46	-2424.175543	p:	0.97642	0.02147	0.00211
				ω:	0.02449	8.42115	117.73257
	M0	42	-2519.080823	ω0:	0.09997
	M2a	45	-2434.987767	p:	0.91417	0.08169	0.00414
				ω:	0.00000	1.00000	59.82940
	M1a	43	-2493.729290	p:	0.93624	0.06376
				ω:	0.00000	1.00000
	M8	45	-2439.780528	p0=0.99095	p=0.04032	q=0.24926
				(p1= 0.00905)	ω= 35.51977
	M7	43	-2508.204270	p=	0.03601	q=	0.20344
	M8a	44	-2493.729224	p0=0.93624	p=0.00500	q=17.99994
				(p1= 0.06376)	ω= 1.00000
rpl2	M3	46	-1146.055757	p:	0.97383	0.01728	0.00889
				ω:	0.20575	0.20591	0.20598
	M0	42	-1146.055757	ω0:	0.20576
	M2a	45	-1146.055757	p:	1.00000	0.00000	0.00000
				ω:	0.20575	1.00000	1.00000
	M1a	43	-1146.055764	p:	0.99999	0.00001
				ω:	0.20575	1.00000
	M8	45	-1146.236772	p0=0.77449	p=0.00500	q=2.27051
				(p1= 0.22551)	ω= 1.00000
	M7	43	-1146.056680	p=	25.75675	q=	99.00000
	M8a	44	-1146.057061	p0=0.99999	p=25.70041	q=99.00000
				(p1= 0.00001)	ω= 1.00000
rpl14	M3	46	-622.805392	p:	0.98895	0.00286	0.00818
				ω:	0.12574	0.12780	272.23579
	M0	42	-688.062614	ω0:	0.03229
	M2a	45	-622.805392	p:	0.99182	0.00000	0.00818
				ω:	0.12574	1.00000	272.23565
	M1a	43	-688.062641	p:	0.99999	0.00001
				ω:	0.03228	1.00000
	M8	45	-622.805476	p0=0.99181	p=2.22269	q=14.71035
				(p1= 0.00819)	ω= 272.25543
	M7	43	-688.063586	p=	3.42640	q=	99.00000
	M8a	44	-688.064028	p0=0.99999	p=3.35153	q=99.00000
				(p1= 0.00001)	ω= 1.00000
rpl16	M3	46	-700.851270	p:	0.99263	0.00000	0.00737
				ω:	0.22833	0.28498	314.22401
	M0	42	-769.616918	ω0:	0.05707
	M2a	45	-700.851270	p:	0.99263	0.00000	0.00737
				ω:	0.22833	1.00000	314.22292
	M1a	43	-769.616963	p:	0.99999	0.00001
				ω:	0.05706	1.00000
	M8	45	-700.853710	p0=0.99263	p=30.55962	q=99.00000
				(p1= 0.00737)	ω= 318.42523
	M7	43	-769.623607	p=	6.12566	q=	99.00000
	M8a	44	-769.626528	p0=0.99999	p=6.05434	q=99.00000
				(p1= 0.00001)	ω= 1.00000
rpl20	M3	46	-631.621065	p:	0.99165	0.00000	0.00835
				ω:	0.23260	7.14731	197.83620
	M0	42	-691.662901	ω0:	0.06096
	M2a	45	-631.621065	p:	0.99165	0.00000	0.00835
				ω:	0.23260	1.00000	197.83594
	M1a	43	-691.663147	p:	0.99999	0.00001
				ω:	0.06096	1.00000
	M8	45	-631.624204	p0=0.99165	p=30.11924	q=98.99587
				(p1= 0.00835)	ω= 197.68737
	M7	43	-691.680744	p=	6.57128	q=	99.00000
	M8a	44	-691.688255	p0=0.99999	p=6.50293	q=99.00000
				(p1= 0.00001)	ω= 1.00000
rpl23	M3	46	-419.397278	p:	0.00000	0.98935	0.01065
				ω:	0.00000	0.00000	999.00000
	M0	42	-522.975016	ω0:	3.10296
	M2a	45	-419.397278	p:	0.98935	0.00000	0.01065
				ω:	0.00000	1.00000	999.00000
	M1a	43	-490.272475	p:	0.99999	0.00001
				ω:	0.00000	1.00000
	M8	45	-419.397268	p0=0.98935	p=0.00500	q=2.07579
				(p1= 0.01065)	ω= 999.00000
	M7	43	-490.271655	p=	0.00500	q=	8.14140
	M8a	44	-490.272134	p0=0.99999	p=0.00500	q=13.77389
				(p1= 0.00001)	ω= 1.00000
rpl32	M3	46	-270.493768	p:	0.00000	0.97958	0.02042
				ω:	0.00000	0.25860	695.41665
	M0	42	-330.039576	ω0:	0.03722
	M2a	45	-270.493768	p:	0.97958	0.00000	0.02042
				ω:	0.25860	1.00000	695.41758
	M1a	43	-330.039732	p:	0.99999	0.00001
				ω:	0.03722	1.00000
	M8	45	-270.494592	p0=0.97958	p=34.66227	q=99.00000
				(p1= 0.02042)	ω= 695.68202
	M7	43	-330.049007	p=	3.96911	q=	99.00000
	M8a	44	-330.053114	p0=0.99999	p=3.89985	q=99.00000
				(p1= 0.00001)	ω= 1.00000
rpl33	M3	46	-371.879691	p:	0.97061	0.01445	0.01494
				ω:	0.12212	0.12213	253.10731
	M0	42	-427.677962	ω0:	0.02130
	M2a	45	-371.879691	p:	0.98506	0.00000	0.01494
				ω:	0.12212	1.00000	253.10763
	M1a	43	-427.678241	p:	0.99999	0.00001
				ω:	0.02130	1.00000
	M8	45	-371.881452	p0=0.98505	p=13.90079	q=99.00000
				(p1= 0.01495)	ω= 253.21579
	M7	43	-427.687298	p=	2.28199	q=	99.00000
	M8a	44	-427.691665	p0=0.99999	p=2.20667	q=99.00000
				(p1= 0.00001)	ω= 1.00000
rpl36	M3	46	-198.320940	p:	0.97367	0.00000	0.02633
				ω:	0.00000	0.00000	999.00000
	M0	42	-292.225151	ω0:	2.31149
	M2a	45	-198.320940	p:	0.97367	0.00000	0.02633
				ω:	0.00000	1.00000	999.00000
	M1a	43	-259.358171	p:	0.99999	0.00001
				ω:	0.00000	1.00000
	M8	45	-198.320929	p0=0.97367	p=0.00500	q=0.60462
				(p1= 0.02633)	ω= 999.00000
	M7	43	-259.357806	p=	0.00500	q=	1.04404
	M8a	44	-259.358095	p0=0.99999	p=0.00500	q=99.00000
				(p1= 0.00001)	ω= 1.00000
rpoA	M3	46	-1665.903214	p:	0.93683	0.02882	0.03435
				ω:	0.23168	0.23170	7.17425
	M0	42	-1675.661245	ω0:	0.42520
	M2a	45	-1665.903214	p:	0.96564	0.00000	0.03436
				ω:	0.23167	1.00000	7.17400
	M1a	43	-1669.704263	p:	0.69122	0.30878
				ω:	0.00000	1.00000
	M8	45	-1665.905867	p0=0.96568	p=29.99209	q=99.00000
				(p1= 0.03432)	ω= 7.17839
	M7	43	-1669.749010	p=	0.00500	q=	0.01028
	M8a	44	-1669.704259	p0=0.69122	p=0.00500	q=15.10203
				(p1= 0.30878)	ω= 1.00000
rpoB	M3	46	-5125.594560	p:	0.00000	0.99906	0.00094
				ω:	0.00000	0.17750	152.72459
	M0	42	-5195.293910	ω0:	0.12705
	M2a	45	-5125.594566	p:	0.99906	0.00000	0.00094
				ω:	0.17749	1.00000	152.72740
	M1a	43	-5195.294108	p:	0.99999	0.00001
				ω:	0.12704	1.00000
	M8	45	-5125.606943	p0=0.99906	p=21.60425	q=99.00000
				(p1= 0.00094)	ω= 152.75092
	M7	43	-5195.313110	p=	14.53531	q=	99.00000
	M8a	44	-5195.333443	p0=0.99999	p=14.47777	q=99.00000
				(p1= 0.00001)	ω= 1.00000
rpoC1	M3	46	-3317.155710	p:	0.73356	0.20426	0.06218
				ω:	0.07598	0.07606	3.16902
	M0	42	-3327.033698	ω0:	0.24526
	M2a	45	-3317.155710	p:	0.93783	0.00000	0.06217
				ω:	0.07602	1.00000	3.16959
	M1a	43	-3318.633435	p:	0.78758	0.21242
				ω:	0.00000	1.00000
	M8	45	-3317.155953	p0=0.93791	p=8.27231	q=99.00000
				(p1= 0.06209)	ω= 3.17242
	M7	43	-3320.316003	p=	0.03523	q=	0.14274
	M8a	44	-3318.633432	p0=0.78758	p=0.00500	q=3.02649
				(p1= 0.21242)	ω= 1.00000
rpoC2	M3	46	-7455.003351	p:	0.63862	0.35782	0.00356
				ω:	0.00000	0.87985	12.27922
	M0	42	-7483.367322	ω0:	0.34200
	M2a	45	-7455.003372	p:	0.70663	0.29018	0.00319
				ω:	0.03855	1.00000	12.79212
	M1a	43	-7463.947617	p:	0.69153	0.30847
				ω:	0.00731	1.00000
	M8	45	-7455.004187	p0=0.99657	p=0.10649	q=0.24969
				(p1= 0.00343)	ω= 12.44788
	M7	43	-7464.073079	p=	0.01432	q=	0.02840
	M8a	44	-7463.949396	p0=0.68880	p=0.01199	q=0.53128
				(p1= 0.31120)	ω= 1.00000
rps2	M3	46	-1151.781517	p:	0.06227	0.93349	0.00424
				ω:	0.45743	0.45746	566.14478
	M0	42	-1229.150055	ω0:	0.12694
	M2a	45	-1151.781723	p:	0.99576	0.00000	0.00424
				ω:	0.45746	1.00000	566.15944
	M1a	43	-1229.150156	p:	0.99999	0.00001
				ω:	0.12694	1.00000
	M8	45	-1151.782703	p0=0.99575	p=83.55435	q=99.00000
				(p1= 0.00425)	ω= 566.52200
	M7	43	-1229.162073	p=	14.53455	q=	99.00000
	M8a	44	-1229.166751	p0=0.99999	p=14.47586	q=99.00000
				(p1= 0.00001)	ω= 1.00000
rps3	M3	46	-1131.406930	p:	0.98478	0.01064	0.00458
				ω:	0.13222	9.41389	180.48325
	M0	42	-1203.912878	ω0:	0.08501
	M2a	45	-1138.438001	p:	0.99542	0.00000	0.00458
				ω:	0.20405	1.00000	175.93877
	M1a	43	-1198.383086	p:	0.96046	0.03954
				ω:	0.03951	1.00000
	M8	45	-1135.452527	p0=0.99542	p=0.00671	q=0.03275
				(p1= 0.00458)	ω= 176.49546
	M7	43	-1200.963047	p=	0.03660	q=	0.22008
	M8a	44	-1198.398832	p0=0.96027	p=4.11620	q=99.00000
				(p1= 0.03973)	ω= 1.00000
rps4	M3	46	-1005.197395	p:	0.77040	0.22463	0.00497
				ω:	0.00000	1.43584	227.31967
	M0	42	-1069.612511	ω0:	0.09148
	M2a	45	-1005.253264	p:	0.69328	0.30175	0.00497
				ω:	0.00000	1.00000	219.89128
	M1a	43	-1069.020345	p:	0.95235	0.04765
				ω:	0.05111	1.00000
	M8	45	-1005.275507	p0=0.99502	p=0.02932	q=0.09733
				(p1= 0.00498)	ω= 226.79381
	M7	43	-1068.946578	p=	0.04446	q=	0.27191
	M8a	44	-1068.919621	p0=0.99999	p=0.14733	q=1.37074
				(p1= 0.00001)	ω= 1.00000
rps7	M3	46	-670.024340	p:	0.99358	0.00000	0.00642
				ω:	0.12066	2.06930	999.00000
	M0	42	-778.058883	ω0:	866.01033
	M2a	45	-670.006356	p:	0.87055	0.12302	0.00642
				ω:	0.00000	1.00000	999.00000
	M1a	43	-754.691298	p:	0.98249	0.01751
				ω:	0.00000	1.00000
	M8	45	-674.125227	p0=0.98715	p=0.00500	q=2.18829
				(p1= 0.01285)	ω= 999.00000
	M7	43	-754.849137	p=	0.07050	q=	1.57941
	M8a	44	-754.691299	p0=0.98249	p=0.00500	q=2.14306
				(p1= 0.01751)	ω= 1.00000
rps8	M3	46	-702.309551	p:	0.60343	0.38914	0.00742
				ω:	0.00000	1.20819	450.54986
	M0	42	-774.273028	ω0:	0.10750
	M2a	45	-702.325078	p:	0.54145	0.45113	0.00742
				ω:	0.00000	1.00000	439.53583
	M1a	43	-774.176177	p:	0.97343	0.02657
				ω:	0.08678	1.00000
	M8	45	-702.384985	p0=0.99257	p=0.03790	q=0.04044
				(p1= 0.00743)	ω= 421.19348
	M7	43	-773.958228	p=	0.21903	q=	1.44404
	M8a	44	-773.987208	p0=0.99999	p=0.43241	q=3.45343
				(p1= 0.00001)	ω= 1.00000
rps11	M3	46	-729.568240	p:	0.00000	0.99279	0.00721
				ω:	0.00000	0.24344	357.97195
	M0	42	-797.984137	ω0:	0.07237
	M2a	45	-729.568240	p:	0.99279	0.00000	0.00721
				ω:	0.24344	1.00000	357.97468
	M1a	43	-797.984339	p:	0.99999	0.00001
				ω:	0.07236	1.00000
	M8	45	-729.571695	p0=0.99279	p=31.94841	q=99.00000
				(p1= 0.00721)	ω= 358.12533
	M7	43	-798.001375	p=	7.86637	q=	99.00000
	M8a	44	-798.008628	p0=0.99999	p=7.80072	q=99.00000
				(p1= 0.00001)	ω= 1.00000
rps12	M3	46	-536.422950	p:	0.97488	0.00000	0.02512
				ω:	0.21910	46.82895	69.97083
	M0	42	-541.444339	ω0:	0.91038
	M2a	45	-536.422950	p:	0.97488	0.00000	0.02512
				ω:	0.21911	1.00000	69.97163
	M1a	43	-540.651765	p:	0.64444	0.35556
				ω:	0.00000	1.00000
	M8	45	-536.439203	p0=0.96579	p=0.00500	q=3.14353
				(p1= 0.03421)	ω= 58.79287
	M7	43	-540.655017	p=	0.01528	q=	0.03672
	M8a	44	-540.651766	p0=0.64444	p=0.00500	q=1.68597
				(p1= 0.35556)	ω= 1.00000
rps14	M3	46	-554.593301	p:	0.88422	0.10586	0.00992
				ω:	0.00000	2.67597	209.48026
	M0	42	-617.522006	ω0:	0.06782
	M2a	45	-555.269741	p:	0.78994	0.20014	0.00992
				ω:	0.00000	1.00000	179.65721
	M1a	43	-614.570268	p:	0.91514	0.08486
				ω:	0.00000	1.00000
	M8	45	-555.753482	p0=0.99008	p=0.03212	q=0.12096
				(p1= 0.00992)	ω= 208.47701
	M7	43	-615.559981	p=	0.03909	q=	0.25615
	M8a	44	-614.570266	p0=0.91514	p=0.00500	q=3.38446
				(p1= 0.08486)	ω= 1.00000
rps15	M3	46	-489.284831	p:	0.61048	0.10486	0.28466
				ω:	0.00000	1.20636	1.20636
	M0	42	-490.173852	ω0:	0.43514
	M2a	45	-489.284831	p:	0.61048	0.00000	0.38952
				ω:	0.00000	1.00000	1.20636
	M1a	43	-489.315220	p:	0.56258	0.43742
				ω:	0.00000	1.00000
	M8	45	-489.284830	p0=0.61048	p=0.00631	q=2.09215
				(p1= 0.38952)	ω= 1.20636
	M7	43	-489.475474	p=	0.06046	q=	0.07154
	M8a	44	-489.315218	p0=0.56258	p=0.00500	q=99.00000
				(p1= 0.43742)	ω= 1.00000
rps16	M3	46	-422.279294	p:	0.46841	0.28239	0.24920
				ω:	0.00000	1.70465	1.70465
	M0	42	-434.178707	ω0:	0.24483
	M2a	45	-422.279294	p:	0.46841	0.00000	0.53159
				ω:	0.00000	1.00000	1.70465
	M1a	43	-422.578483	p:	0.45836	0.54164
				ω:	0.00000	1.00000
	M8	45	-422.435390	p0=0.68843	p=0.00500	q=0.00761
				(p1= 0.31157)	ω= 1.52531
	M7	43	-423.909452	p=	0.02150	q=	0.01020
	M8a	44	-422.578450	p0=0.45836	p=0.00500	q=99.00000
				(p1= 0.54164)	ω= 1.00000
rps18	M3	46	-390.408996	p:	0.97010	0.01101	0.01889
				ω:	0.08128	0.08129	11.11096
	M0	42	-398.411034	ω0:	0.29920
	M2a	45	-390.408996	p:	0.98111	0.00000	0.01889
				ω:	0.08128	1.00000	11.11096
	M1a	43	-393.425601	p:	0.88911	0.11089
				ω:	0.00000	1.00000
	M8	45	-390.409751	p0=0.98111	p=8.87917	q=99.00000
				(p1= 0.01889)	ω= 11.11168
	M7	43	-395.076034	p=	0.00500	q=	0.01113
	M8a	44	-393.425594	p0=0.88911	p=0.00500	q=99.00000
				(p1= 0.11089)	ω= 1.00000
rps19	M3	46	-510.487351	p:	0.00000	0.98923	0.01077
				ω:	0.00000	0.74835	462.47833
	M0	42	-593.100342	ω0:	2.38927
	M2a	45	-510.487351	p:	0.98923	0.00000	0.01077
				ω:	0.74835	1.00000	462.47917
	M1a	43	-575.170101	p:	0.99999	0.00001
				ω:	0.10881	1.00000
	M8	45	-510.488011	p0=0.98923	p=32.12647	q=10.82973
				(p1= 0.01077)	ω= 462.91729
	M7	43	-575.177830	p=	12.24204	q=	99.00000
	M8a	44	-575.181084	p0=0.99999	p=12.18587	q=99.00000
				(p1= 0.00001)	ω= 1.00000
ycf1	M3	46	-12407.060938	p:	0.75467	0.22925	0.01608
				ω:	0.14217	1.42782	7.69584
	M0	42	-12565.490761	ω0:	0.48713
	M2a	45	-12407.436331	p:	0.62234	0.35412	0.02354
				ω:	0.06907	1.00000	6.53306
	M1a	43	-12451.169872	p:	0.66012	0.33988
				ω:	0.05660	1.00000
	M8	45	-12407.532472	p0=0.97520	p=0.07305	q=0.08992
				(p1= 0.02480)	ω= 6.31780
	M7	43	-12451.520712	p=	0.05857	q=	0.07392
	M8a	44	-12451.207790	p0=0.66010	p=6.01687	q=99.00000
				(p1= 0.33990)	ω= 1.00000
ycf2	M3	46	-9803.072696	p:	0.00000	0.99566	0.00434
				ω:	0.00000	0.68602	70.27527
	M0	42	-9827.674840	ω0:	0.98467
	M2a	45	-9803.132936	p:	0.99581	0.00000	0.00419
				ω:	0.71512	1.00000	75.67584
	M1a	43	-9824.539269	p:	0.48823	0.51177
				ω:	0.00000	1.00000
	M8	45	-9803.132649	p0=0.99581	p=9.76097	q=3.95131
				(p1= 0.00419)	ω= 75.77014
	M7	43	-9824.817329	p=	0.01871	q=	0.00521
	M8a	44	-9824.257349	p0=0.48811	p=0.00500	q=1.10885
				(p1= 0.51189)	ω= 1.00000
ycf3	M3	46	-800.609846	p:	0.00036	0.00472	0.99492
				ω:	0.02379	0.02380	0.02380
	M0	42	-800.609846	ω0:	0.02380
	M2a	45	-800.609846	p:	1.00000	0.00000	0.00000
				ω:	0.02380	1.00000	1.00000
	M1a	43	-800.609946	p:	0.99999	0.00001
				ω:	0.02380	1.00000
	M8	45	-801.457829	p0=0.99999	p=2.53387	q=99.00000
				(p1= 0.00001)	ω= 1.00000
	M7	43	-801.457702	p=	2.53397	q=	99.00000
	M8a	44	-800.613462	p0=0.99999	p=2.45593	q=99.00000
				(p1= 0.00001)	ω= 1.00000
ycf4	M3	46	-943.103618	p:	0.33847	0.06483	0.59670
				ω:	0.00000	0.00000	0.30923
	M0	42	-943.228595	ω0:	0.18361
	M2a	45	-943.210741	p:	0.97604	0.00917	0.01479
				ω:	0.16584	1.00000	1.00000
	M1a	43	-943.210741	p:	0.97604	0.02396
				ω:	0.16584	1.00000
	M8	45	-943.122390	p0=0.99999	p=0.67075	q=2.69334
				(p1= 0.00001)	ω= 1.00000
	M7	43	-943.122309	p=	0.67075	q=	2.69325
	M8a	44	-943.131061	p0=0.99999	p=0.96466	q=4.18759
				(p1= 0.00001)	ω= 1.00000

## Sheet: TableS5
Table S5-1. Predicted RNA editing sites in the cp genome of D.obtusifolia
Gene	Nucleotide Position	Amino Acid Position	Codon	Conversion	Score
accD	347	116	123	CCA (P) => CTA (L)	1
	415	139	151	CAT (H) => TAT (Y)	1
	815	272	290	TCG (S) => TTG (L)	0.8
atpA	791	264	264	CCC (P) => CTC (L)	1
	914	305	305	TCA (S) => TTA (L)	1
atpF	92	31	31	CCA (P) => CTA (L)	0.86
atpI	76	26	28	CTC (L) => TTC (F)	0.86
ccsA	7	3	3	CTT (L) => TTT (F)	1
	71	24	24	ACT (T) => ATT (I)	1
	875	292	302	GCG (A) => GTG (V)	0.86
clpP	559	187	187	CAC (H) => TAC (Y)	1
matK	1214	405	414	TCA (S) => TTA (L)	0.86
ndhA	341	114	114	TCA (S) => TTA (L)	1
	844	282	282	CCT (P) => TCT (S)	1
	1073	358	358	TCT (S) => TTT (F)	1
ndhB	95	32	50	TCA (S) => TTA (L)	1
	413	138	156	CCA (P) => CTA (L)	1
	488	163	181	ACG (T) => ATG (M)	1
	532	178	196	CAT (H) => TAT (Y)	1
	557	186	204	TCA (S) => TTA (L)	0.8
	692	231	249	TCT (S) => TTT (F)	1
	776	259	277	TCA (S) => TTA (L)	1
	782	261	279	TCA (S) => TTA (L)	1
	1201	401	419	CAT (H) => TAT (Y)	1
	1427	476	494	CCA (P) => CTA (L)	1
ndhD	5	2	2	ACG (T) => ATG (M)	1
	386	129	129	CCA (P) => CTA (L)	1
	881	294	294	TCA (S) => TTA (L)	1
	1301	434	434	TCA (S) => TTA (L)	0.8
	1408	470	470	CTT (L) => TTT (F)	0.8
ndhF	13	5	5	CAT (H) => TAT (Y)	1
	247	83	83	CTT (L) => TTT (F)	1
	592	198	198	CTT (L) => TTT (F)	0.8
	2221	741	746	CTT (L) => TTT (F)	1
	2237	746	751	TCT (S) => TTT (F)	1
ndhG	166	56	56	CAT (H) => TAT (Y)	0.8
	314	105	105	ACA (T) => ATA (I)	0.8
	494	165	165	GCT (A) => GTT (V)	0.8
petB	611	204	204	CCA (P) => CTA (L)	1
psbE	214	72	72	CCT (P) => TCT (S)	1
psbF	77	26	26	TCT (S) => TTT (F)	1
psbL	2	1	1	ACG (T) => ATG (M)	1
rpoB	338	113	113	TCT (S) => TTT (F)	1
	566	189	190	TCG (S) => TTG (L)	1
	2000	667	684	TCT (S) => TTT (F)	1
rpoC1	41	14	14	TCA (S) => TTA (L)	1
	1891	631	655	CCT (P) => TCT (S)	1
rpoC2	1600	534	553	CCT (P) => TTT (F)	1
	1601	534	553	CCT (P) => TTT (F)	1
	1681	561	582	CAT (H) => TAT (Y)	0.86
	1927	643	824	CCC (P) => TCC (S)	1
	2944	982	1180	CTT (L) => TTT (F)	1
	3233	1078	1282	CCG (P) => CTG (L)	1
	3764	1255	1459	TCA (S) => TTA (L)	0.86
rps14	80	27	27	TCA (S) => TTA (L)	1
rps16	212	71	71	TCA (S) => TTA (L)	0.83
	230	77	77	TCT (S) => TTT (F)	1
rps2	182	61	61	GCT (A) => GTT (V)	0.86
	248	83	83	TCA (S) => TTA (L)	1
	266	89	89	ACA (T) => ATA (I)	0.86
Table S5-2. Predicted RNA editing sites in the cp genome of D.hupeana
Gene	Nucleotide Position	Amino Acid Position	Codon	Conversion	Score
accD	347	116	123	CCA (P) => CTA (L)	1
	415	139	151	CAT (H) => TAT (Y)	1
	815	272	290	TCG (S) => TTG (L)	0.8
atpA	791	264	264	CCC (P) => CTC (L)	1
	914	305	305	TCA (S) => TTA (L)	1
atpF	92	31	31	CCA (P) => CTA (L)	0.86
ccsA	7	3	3	CTT (L) => TTT (F)	1
	71	24	24	ACT (T) => ATT (I)	1
	875	292	302	GCG (A) => GTG (V)	0.86
clpP	559	187	187	CAC (H) => TAC (Y)	1
ndhA	341	114	114	TCA (S) => TTA (L)	1
	844	282	282	CCT (P) => TCT (S)	1
	1073	358	358	TCT (S) => TTT (F)	1
ndhB_	95	32	50	TCA (S) => TTA (L)	1
	413	138	156	CCA (P) => CTA (L)	1
	488	163	181	ACG (T) => ATG (M)	1
	532	178	196	CAT (H) => TAT (Y)	1
	557	186	204	TCA (S) => TTA (L)	0.8
	692	231	249	TCT (S) => TTT (F)	1
	776	259	277	TCA (S) => TTA (L)	1
	782	261	279	TCA (S) => TTA (L)	1
	1201	401	419	CAT (H) => TAT (Y)	1
	1427	476	494	CCA (P) => CTA (L)	1
ndhD	5	2	2	ACG (T) => ATG (M)	1
	386	129	129	CCA (P) => CTA (L)	1
	881	294	294	TCA (S) => TTA (L)	1
	1301	434	434	TCA (S) => TTA (L)	0.8
	1408	470	470	CTT (L) => TTT (F)	0.8
ndhF	13	5	5	CAT (H) => TAT (Y)	1
	247	83	83	CTT (L) => TTT (F)	1
	592	198	198	CTT (L) => TTT (F)	0.8
	2221	741	746	CTT (L) => TTT (F)	1
	2237	746	751	TCT (S) => TTT (F)	1
ndhG	166	56	56	CAT (H) => TAT (Y)	0.8
	314	105	105	ACA (T) => ATA (I)	0.8
	494	165	165	GCT (A) => GTT (V)	0.8
petB	611	204	204	CCA (P) => CTA (L)	1
psbE	214	72	72	CCT (P) => TCT (S)	1
psbF	77	26	26	TCT (S) => TTT (F)	1
psbL	2	1	1	ACG (T) => ATG (M)	1
rpoB	338	113	113	TCT (S) => TTT (F)	1
	566	189	190	TCG (S) => TTG (L)	1
	2000	667	684	TCT (S) => TTT (F)	1
rpoC1	41	14	14	TCA (S) => TTA (L)	1
	1891	631	655	CCT (P) => TCT (S)	1
rpoC2	1600	534	553	CCT (P) => TTT (F)	1
	1601	534	553	CCT (P) => TTT (F)	1
	1681	561	582	CAT (H) => TAT (Y)	0.86
	1927	643	824	CCT (P) => TCT (S)	1
	2938	980	1180	CTT (L) => TTT (F)	1
	3758	1253	1459	TCA (S) => TTA (L)	0.86
rps14	80	27	27	TCA (S) => TTA (L)	1
rps16	212	71	71	TCA (S) => TTA (L)	0.83
	230	77	77	TCT (S) => TTT (F)	1
rps2	182	61	61	GCT (A) => GTT (V)	0.86
	248	83	83	TCA (S) => TTA (L)	1
	266	89	89	ACA (T) => ATA (I)	0.86
Table S5-3. Predicted RNA editing sites in the cp genome of D.mimosoides
Gene	Nucleotide Position	Amino Acid Position	Codon	Conversion	Score
accD	347	116	123	CCA (P) => CTA (L)	1
	415	139	151	CAT (H) => TAT (Y)	1
	815	272	290	TCG (S) => TTG (L)	0.8
atpA	791	264	264	CCC (P) => CTC (L)	1
	914	305	305	TCA (S) => TTA (L)	1
atpF	92	31	31	CCA (P) => CTA (L)	0.86
atpI	76	26	28	CTC (L) => TTC (F)	0.86
ccsA	7	3	3	CTT (L) => TTT (F)	1
	71	24	24	ACT (T) => ATT (I)	1
	875	292	301	GCG (A) => GTG (V)	0.86
clpP	559	187	187	CAC (H) => TAC (Y)	1
matK	637	213	221	CTC (L) => TTC (F)	0.86
	1211	404	412	TCA (S) => TTA (L)	0.86
ndhA	341	114	114	TCA (S) => TTA (L)	1
	844	282	282	CCT (P) => TCT (S)	1
	1073	358	358	TCT (S) => TTT (F)	1
ndhB	95	32	50	TCA (S) => TTA (L)	1
	413	138	156	CCA (P) => CTA (L)	1
	488	163	181	ACG (T) => ATG (M)	1
	532	178	196	CAT (H) => TAT (Y)	1
	557	186	204	TCA (S) => TTA (L)	0.8
	692	231	249	TCT (S) => TTT (F)	1
	776	259	277	TCA (S) => TTA (L)	1
	782	261	279	TCA (S) => TTA (L)	1
	1201	401	419	CAT (H) => TAT (Y)	1
	1427	476	494	CCG (P) => CTG (L)	1
ndhD	5	2	2	ACG (T) => ATG (M)	1
	386	129	129	CCT (P) => CTT (L)	1
	881	294	294	TCA (S) => TTA (L)	1
	1301	434	434	TCA (S) => TTA (L)	0.8
	1408	470	470	CTT (L) => TTT (F)	0.8
ndhF	13	5	5	CAT (H) => TAT (Y)	1
	247	83	83	CTT (L) => TTT (F)	1
	592	198	198	CTT (L) => TTT (F)	0.8
	2221	741	746	CTT (L) => TTT (F)	1
	2237	746	751	TCT (S) => TTT (F)	1
ndhG	166	56	56	CAT (H) => TAT (Y)	0.8
	314	105	105	ACA (T) => ATA (I)	0.8
	494	165	165	GCT (A) => GTT (V)	0.8
petB	611	204	204	CCA (P) => CTA (L)	1
psbE	214	72	72	CCT (P) => TCT (S)	1
psbF	77	26	26	TCT (S) => TTT (F)	1
psbL	2	1	1	ACG (T) => ATG (M)	1
rpoB	338	113	113	TCT (S) => TTT (F)	1
	566	189	190	TCG (S) => TTG (L)	1
	2000	667	684	TCT (S) => TTT (F)	1
rpoC1	41	14	14	TCA (S) => TTA (L)	1
	1891	631	655	CCT (P) => TCT (S)	1
rpoC2	1606	536	555	CCT (P) => TTT (F)	1
	1607	536	555	CCT (P) => TTT (F)	1
	1687	563	584	CAT (H) => TAT (Y)	0.86
	1933	645	826	CCC (P) => TCC (S)	1
	2950	984	1182	CTT (L) => TTT (F)	1
	3770	1257	1461	TCA (S) => TTA (L)	0.86
rps14	80	27	27	TCA (S) => TTA (L)	1
	212	71	71	TCA (S) => TTA (L)	0.83
rps16	230	77	77	TCT (S) => TTT (F)	1
rps2	182	61	61	GCT (A) => GTT (V)	0.86
	248	83	83	TCA (S) => TTA (L)	1
Table S5-4. Predicted RNA editing sites in the cp genome of D. sissoo
Gene	Nucleotide Position	Amino Acid Position	Codon	Conversion	Score
accD	347	116	123	CCA (P) => CTA (L)	1
	415	139	151	CAT (H) => TAT (Y)	1
	815	272	290	TCG (S) => TTG (L)	0.8
atpA	791	264	264	CCC (P) => CTC (L)	1
	914	305	305	TCA (S) => TTA (L)	1
atpF	92	31	31	CCA (P) => CTA (L)	0.86
atpI	76	26	28	CTC (L) => TTC (F)	0.86
ccsA	7	3	3	CTT (L) => TTT (F)	1
	71	24	24	ACT (T) => ATT (I)	1
	875	292	302	GCG (A) => GTG (V)	0.86
clpP	559	187	187	CAC (H) => TAC (Y)	1
matK	637	213	221	CTC (L) => TTC (F)	0.86
	1211	404	412	TCA (S) => TTA (L)	0.86
ndhA	341	114	114	TCA (S) => TTA (L)	1
	844	282	282	CCT (P) => TCT (S)	1
	1073	358	358	TCT (S) => TTT (F)	1
ndhB	95	32	50	TCA (S) => TTA (L)	1
	413	138	156	CCA (P) => CTA (L)	1
	488	163	181	ACG (T) => ATG (M)	1
	532	178	196	CAT (H) => TAT (Y)	1
	557	186	204	TCA (S) => TTA (L)	0.8
	692	231	249	TCT (S) => TTT (F)	1
	776	259	277	TCA (S) => TTA (L)	1
	782	261	279	TCA (S) => TTA (L)	1
	1201	401	419	CAT (H) => TAT (Y)	1
	1427	476	494	CCA (P) => CTA (L)	1
ndhD	5	2	2	ACG (T) => ATG (M)	1
	386	129	129	CCA (P) => CTA (L)	1
	881	294	294	TCA (S) => TTA (L)	1
	1301	434	434	TCA (S) => TTA (L)	0.8
	1408	470	470	CTT (L) => TTT (F)	0.8
ndhF	13	5	5	CAT (H) => TAT (Y)	1
	247	83	83	CTT (L) => TTT (F)	1
	592	198	198	CTT (L) => TTT (F)	0.8
	2221	741	746	CTT (L) => TTT (F)	1
	2237	746	751	TCT (S) => TTT (F)	1
ndhG	166	56	56	CAT (H) => TAT (Y)	0.8
	314	105	105	ACA (T) => ATA (I)	0.8
	494	165	165	GCT (A) => GTT (V)	0.8
petB	611	204	204	CCA (P) => CTA (L)	1
psbE	214	72	72	CCT (P) => TCT (S)	1
psbF	77	26	26	TCT (S) => TTT (F)	1
psbL	2	1	1	ACG (T) => ATG (M)	1
rpoB	338	113	113	TCT (S) => TTT (F)	1
	566	189	190	TCG (S) => TTG (L)	1
	2000	667	684	TCT (S) => TTT (F)	1
rpoC1	41	14	14	TCA (S) => TTA (L)	1
	1891	631	655	CCT (P) => TCT (S)	1
rpoC2	1606	536	555	CCT (P) => TTT (F)	1
	1607	536	555	CCT (P) => TTT (F)	1
	1687	563	584	CAT (H) => TAT (Y)	0.86
	1933	645	826	CCC (P) => TCC (S)	1
	2950	984	1182	CTT (L) => TTT (F)	1
	3770	1257	1461	TCA (S) => TTA (L)	0.86
rps14	80	27	27	TCA (S) => TTA (L)	1
rps16	212	71	71	TCA (S) => TTA (L)	0.83
	230	77	77	TCT (S) => TTT (F)	1
rps2	182	61	61	GCT (A) => GTT (V)	0.86
	248	83	83	TCA (S) => TTA (L)	1
Table S5-5. Predicted RNA editing sites in the cp genome of D. balansae
Gene	Nucleotide Position	Amino Acid Position	Codon	Conversion	Score
accD	347	116	123	CCA (P) => CTA (L)	1
	415	139	151	CAT (H) => TAT (Y)	1
	815	272	290	TCG (S) => TTG (L)	0.8
atpA	791	264	264	CCC (P) => CTC (L)	1
	914	305	305	TCA (S) => TTA (L)	1
atpF	92	31	31	CCA (P) => CTA (L)	0.86
ccsA	7	3	3	CTT (L) => TTT (F)	1
	71	24	24	ACT (T) => ATT (I)	1
	875	292	302	GCG (A) => GTG (V)	0.86
clpP	559	187	187	CAC (H) => TAC (Y)	1
ndhA	341	114	114	TCA (S) => TTA (L)	1
	844	282	282	CCT (P) => TCT (S)	1
	1073	358	358	TCT (S) => TTT (F)	1
ndhB	95	32	50	TCA (S) => TTA (L)	1
	413	138	156	CCA (P) => CTA (L)	1
	488	163	181	ACG (T) => ATG (M)	1
	532	178	196	CAT (H) => TAT (Y)	1
	557	186	204	TCA (S) => TTA (L)	0.8
	692	231	249	TCT (S) => TTT (F)	1
	776	259	277	TCA (S) => TTA (L)	1
	782	261	279	TCA (S) => TTA (L)	1
	1201	401	419	CAT (H) => TAT (Y)	1
	1427	476	494	CCA (P) => CTA (L)	1
ndhD	5	2	2	ACG (T) => ATG (M)	1
	386	129	129	CCA (P) => CTA (L)	1
	881	294	294	TCA (S) => TTA (L)	1
	1301	434	434	TCA (S) => TTA (L)	0.8
	1408	470	470	CTT (L) => TTT (F)	0.8
ndhF	13	5	5	CAT (H) => TAT (Y)	1
	247	83	83	CTT (L) => TTT (F)	1
	592	198	198	CTT (L) => TTT (F)	0.8
	2221	741	746	CTT (L) => TTT (F)	1
	2237	746	751	TCT (S) => TTT (F)	1
ndhG	166	56	56	CAT (H) => TAT (Y)	0.8
	314	105	105	ACA (T) => ATA (I)	0.8
	494	165	165	GCT (A) => GTT (V)	0.8
matK	637	213	222	CTC (L) => TTC (F)	0.86
	1211	404	413	TCA (S) => TTA (L)	0.86
psbE	214	72	72	CCT (P) => TCT (S)	1
psbF	77	26	26	TCT (S) => TTT (F)	1
psbL	2	1	1	ACG (T) => ATG (M)	1
rpoB	338	113	113	TCT (S) => TTT (F)	1
	566	189	190	TCG (S) => TTG (L)	1
	2000	667	684	TCT (S) => TTT (F)	1
rpoC1	41	14	14	TCA (S) => TTA (L)	1
	1891	631	655	CCT (P) => TCT (S)	1
rpoC2	1600	534	553	CCT (P) => TTT (F)	1
	1601	534	553	CCT (P) => TTT (F)	1
	1681	561	582	CAT (H) => TAT (Y)	0.86
	1927	643	824	CCT (P) => TCT (S)	1
	2938	980	1180	CTT (L) => TTT (F)	1
	3758	1253	1459	TCA (S) => TTA (L)	0.86
rps2	182	61	61	GCT (A) => GTT (V)	0.86
	248	83	83	TCA (S) => TTA (L)	1
	266	89	89	ACA (T) => ATA (I)	0.86
rps14	80	27	27	TCA (S) => TTA (L)	1
rps16	212	71	71	TCA (S) => TTA (L)	0.83
	230	77	77	TCT (S) => TTT (F)	1
Table S5-6. Predicted RNA editing sites in the cp genome of D. hancei
Gene	Nucleotide Position	Amino Acid Position	Codon	Conversion	Score
accD	347	116	123	CCA (P) => CTA (L)	1
	415	139	151	CAT (H) => TAT (Y)	1
	815	272	290	TCG (S) => TTG (L)	0.8
atpA	791	264	264	CCC (P) => CTC (L)	1
	914	305	305	TCA (S) => TTA (L)	1
atpF	92	31	31	CCA (P) => CTA (L)	0.86
atpI	76	26	28	CTC (L) => TTC (F)	0.86
	211	71	73	CTC (L) => TTC (F)	1
ccsA	7	3	3	CTT (L) => TTT (F)	1
	71	24	24	ACT (T) => ATT (I)	1
	875	292	301	GCG (A) => GTG (V)	0.86
clpP	559	187	187	CAC (H) => TAC (Y)	1
ndhA	341	114	114	TCA (S) => TTA (L)	1
	844	282	282	CCT (P) => TCT (S)	1
	1073	358	358	TCT (S) => TTT (F)	1
ndhB	95	32	50	TCA (S) => TTA (L)	1
	413	138	156	CCA (P) => CTA (L)	1
	488	163	181	ACG (T) => ATG (M)	1
	532	178	196	CAT (H) => TAT (Y)	1
	557	186	204	TCA (S) => TTA (L)	0.8
	692	231	249	TCT (S) => TTT (F)	1
	776	259	277	TCA (S) => TTA (L)	1
	782	261	279	TCA (S) => TTA (L)	1
	1201	401	419	CAT (H) => TAT (Y)	1
	1427	476	494	CCG (P) => CTG (L)	1
ndhD	5	2	2	ACG (T) => ATG (M)	1
	386	129	129	CCT (P) => CTT (L)	1
	881	294	294	TCA (S) => TTA (L)	1
	1301	434	434	TCA (S) => TTA (L)	0.8
	1408	470	470	CTT (L) => TTT (F)	0.8
ndhF	13	5	5	CAT (H) => TAT (Y)	1
	247	83	83	CTT (L) => TTT (F)	1
	592	198	198	CTT (L) => TTT (F)	0.8
	2221	741	746	CTT (L) => TTT (F)	1
	2237	746	751	TCT (S) => TTT (F)	1
ndhG	166	56	56	CAT (H) => TAT (Y)	0.8
	314	105	105	ACA (T) => ATA (I)	0.8
	494	165	165	GCT (A) => GTT (V)	0.8
matK	637	213	221	CTC (L) => TTC (F)	0.86
	1211	404	412	TCA (S) => TTA (L)	0.86
petB	611	204	204	CCA (P) => CTA (L)	1
psbE	214	72	72	CCT (P) => TCT (S)	1
psbF	77	26	26	TCT (S) => TTT (F)	1
psbL	2	1	1	ACG (T) => ATG (M)	1
rpoB	338	113	113	TCT (S) => TTT (F)	1
	566	189	190	TCG (S) => TTG (L)	1
	2000	667	684	TCT (S) => TTT (F)	1
rpoC1	41	14	14	TCA (S) => TTA (L)	1
	1891	631	655	CCT (P) => TCT (S)	1
rpoC2	1606	536	555	CCT (P) => TTT (F)	1
	1607	536	555	CCT (P) => TTT (F)	1
	1687	563	584	CAT (H) => TAT (Y)	0.86
	1933	645	826	CCC (P) => TCC (S)	1
	2950	984	1182	CTT (L) => TTT (F)	1
	3770	1257	1461	TCA (S) => TTA (L)	0.86
rps2	182	61	61	GCT (A) => GTT (V)	0.86
	248	83	83	TCA (S) => TTA (L)	1
rps14	80	27	27	TCA (S) => TTA (L)	1
rps16	212	71	71	TCA (S) => TTA (L)	0.83
	230	77	77	TCT (S) => TTT (F)	1
Table S5-7. Predicted RNA editing sites in the cp genome of D. cochinchinensis
Gene	Nucleotide Position	Amino Acid Position	Codon	Conversion	Score
accD	346	116	408	CCA (P) => TCA (S)	0.8
atpF	92	31	31	CCA (P) => CTA (L)	0.86
atpI	76	26	28	CTC (L) => TTC (F)	0.86
ccsA	7	3	3	CTT (L) => TTT (F)	1
	71	24	24	ACT (T) => ATT (I)	1
clpP	559	187	187	CAC (H) => TAC (Y)	1
matK	167	56	305	CCG (P) => CTG (L)	1
	214	72	321	CTC (L) => TTC (F)	0.86
ndhA	122	41	62	ACA (T) => ATA (I)	1
	373	125	157	CAT (H) => TAT (Y)	1
	751	251	284	CCT (P) => TCT (S)	1
	980	327	360	TCT (S) => TTT (F)	1
ndhB	14	5	19	ACG (T) => ATG (M)	1
	68	23	50	CCG (P) => CTG (L)	1
	179	60	132	TCT (S) => TTT (F)	1
	209	70	154	GCT (A) => GTT (V)	1
	400	134	272	CCC (P) => TCC (S)	1
	457	153	291	CCC (P) => TCC (S)	0.8
	463	155	306	CCC (P) => TCC (S)	1
	721	241	419	CAT (H) => TAT (Y)	1
	947	316	494	CCA (P) => CTA (L)	1
ndhD	49	17	141	CGG (R) => TGG (W)	1
ndhF	253	85	329	CAT (H) => TAT (Y)	1
ndhG	133	45	47	CCC (P) => TCC (S)	1
	149	50	52	CCG (P) => CTG (L)	1
psbE	214	72	72	CCT (P) => TCT (S)	1
psbF	77	26	26	TCT (S) => TTT (F)	1
psbL	2	1	1	ACG (T) => ATG (M)	1
rpoB	338	113	113	TCT (S) => TTT (F)	1
rpoC1	41	14	14	TCA (S) => TTA (L)	1
rps14	80	27	27	TCA (S) => TTA (L)	1
rps16	212	71	71	TCA (S) => TTA (L)	0.83
rps2	182	61	61	GCT (A) => GTT (V)	0.86
	248	83	83	TCA (S) => TTA (L)	1
	266	89	89	ACA (T) => ATA (I)	0.86
Table S5-8. Predicted RNA editing sites in the cp genome of D. oliveri
Gene	Nucleotide Position	Amino Acid Position	Codon	Conversion	Score
accD	346	116	408	CCA (P) => TCA (S)	0.8
	92	31	31	CCA (P) => CTA (L)	0.86
atpI	76	26	28	CTC (L) => TTC (F)	0.86
ccsA	7	3	3	CTT (L) => TTT (F)	1
	71	24	24	ACT (T) => ATT (I)	1
clpP	559	187	187	CAC (H) => TAC (Y)	1
matK	406	136	409	CCG (P) => TCG (S)	0.86
	472	158	431	CCT (P) => TCT (S)	1
ndhA	122	41	62	ACA (T) => ATA (I)	1
	296	99	133	TCC (S) => TTC (F)	1
	373	125	159	CAT (H) => TAT (Y)	1
	751	251	286	CCT (P) => TCT (S)	1
	980	327	362	TCT (S) => TTT (F)	1
ndhB	14	5	19	ACG (T) => ATG (M)	1
	68	23	50	CCG (P) => CTG (L)	1
	158	53	133	GCG (A) => GTG (V)	0.8
	200	67	194	TCA (S) => TTA (L)	1
	211	71	198	CCT (P) => TTT (F)	1
	212	71	198	CCT (P) => TTT (F)	1
	232	78	205	CCA (P) => TCA (S)	1
	400	134	292	CCC (P) => TCC (S)	1
	721	241	419	CAT (H) => TAT (Y)	1
	947	316	494	CCA (P) => CTA (L)	1
ndhD	49	17	141	CGG (R) => TGG (W)	1
	307	103	380	CCA (P) => TCA (S)	0.8
ndhF	127	43	196	CTT (L) => TTT (F)	0.8
	269	90	324	ACG (T) => ATG (M)	1
	313	105	352	CCA (P) => TCA (S)	1
ndhG	82	28	38	CCT (P) => TCT (S)	1
	119	40	51	ACA (T) => ATA (I)	0.8
	325	109	121	CAT (H) => TAT (Y)	1
psbE	214	72	72	CCT (P) => TCT (S)	1
psbF	77	26	26	TCT (S) => TTT (F)	1
psbL	2	1	1	ACG (T) => ATG (M)	1
rpoA	236	79	172	ACA (T) => ATA (I)	1
rpoB	338	113	113	TCT (S) => TTT (F)	1
rpoC1	41	14	14	TCG (S) => TTG (L)	1
rps14	80	27	27	TCA (S) => TTA (L)	1
rps16	212	71	71	TCA (S) => TTA (L)	0.83
	230	77	77	TCT (S) => TTT (F)	1
rps2	182	61	61	GCT (A) => GTT (V)	0.86
	248	83	83	TCA (S) => TTA (L)	1
	266	89	89	ACA (T) => ATA (I)	0.86
Table S5-9. Predicted RNA editing sites in the cp genome of D. cultrata
Gene	Nucleotide Position	Amino Acid Position	Codon	Conversion	Score
accD	346	116	408	CCA (P) => TCA (S)	0.8
atpF	92	31	31	CCA (P) => CTA (L)	0.86
atpI	76	26	28	CTC (L) => TTC (F)	0.86
ccsA	7	3	3	CTT (L) => TTT (F)	1
	71	24	24	ACT (T) => ATT (I)	1
clpP	559	187	187	CAC (H) => TAC (Y)	1
matK	167	56	305	CCG (P) => CTG (L)	1
	214	72	321	CTC (L) => TTC (F)	0.86
ndhA	256	86	112	CCA (P) => TCA (S)	1
	751	251	287	CCT (P) => TCT (S)	1
	980	327	363	TCT (S) => TTT (F)	1
ndhB	14	5	19	ACG (T) => ATG (M)	1
	68	23	50	CCG (P) => CTG (L)	1
	179	60	132	TCT (S) => TTT (F)	1
	209	70	154	GCT (A) => GTT (V)	1
	400	134	272	CCC (P) => TCC (S)	1
	457	153	291	CCC (P) => TCC (S)	0.8
	463	155	306	CCC (P) => TCC (S)	1
	721	241	419	CAT (H) => TAT (Y)	1
	947	316	494	CCA (P) => CTA (L)	1
ndhD	49	17	141	CGG (R) => TGG (W)	1
	307	103	380	CCA (P) => TCA (S)	0.8
ndhF	266	89	324	ACG (T) => ATG (M)	1
	310	104	352	CCA (P) => TCA (S)	1
	478	160	444	CTT (L) => TTT (F)	1
ndhG	133	45	47	CCC (P) => TCC (S)	1
	149	50	52	CCG (P) => CTG (L)	1
psbE	214	72	72	CCT (P) => TCT (S)	1
psbF	77	26	26	TCT (S) => TTT (F)	1
psbL	2	1	1	ACG (T) => ATG (M)	1
rpoA	176	59	223	ACT (T) => ATT (I)	1
rpoB	338	113	113	TCT (S) => TTT (F)	1
rpoC1	41	14	14	TCA (S) => TTA (L)	1
rps14	80	27	27	TCA (S) => TTA (L)	1
rps16	212	71	71	TCA (S) => TTA (L)	0.83
	230	77	77	TCT (S) => TTT (F)	1
rps2	182	61	61	GCT (A) => GTT (V)	0.86
	248	83	83	TCA (S) => TTA (L)	1
Table S5-10. Predicted RNA editing sites in the cp genome of D. bariensis
Gene	Nucleotide Position	Amino Acid Position	Codon	Conversion	Score
accD	346	116	408	CCA (P) => TCA (S)	0.8
atpF	92	31	31	CCA (P) => CTA (L)	0.86
atpI	76	26	28	CTC (L) => TTC (F)	0.86
ccsA	7	3	3	CTT (L) => TTT (F)	1
	71	24	24	ACT (T) => ATT (I)	1
clpP	559	187	187	CAC (H) => TAC (Y)	1
matK	167	136	409	CCG (P) => TCG (S)	0.86
	214	158	431	CCT (P) => TCT (S)	1
ndhA	122	41	62	ACA (T) => ATA (I)	1
	373	125	157	CAT (H) => TAT (Y)	1
	751	251	284	CCT (P) => TCT (S)	1
	980	327	360	TCT (S) => TTT (F)	1
ndhB	14	5	19	ACG (T) => ATG (M)	1
	68	23	50	CCG (P) => CTG (L)	1
	179	60	132	TCT (S) => TTT (F)	1
	209	70	154	GCT (A) => GTT (V)	1
	400	134	272	CCC (P) => TCC (S)	1
	457	153	291	CCC (P) => TCC (S)	0.8
	463	155	306	CCC (P) => TCC (S)	1
	721	241	419	CAT (H) => TAT (Y)	1
	947	316	494	CCA (P) => CTA (L)	1
ndhD	49	17	141	CGG (R) => TGG (W)	1
	307	103	380	CCA (P) => TCA (S)	0.8
ndhF	23	8	11	ACC (T) => ATC (I)	1
ndhG	82	28	38	CCT (P) => TCT (S)	1
	119	40	51	ACA (T) => ATA (I)	0.8
	325	109	121	CAT (H) => TAT (Y)	1
	448	150	162	CCA (P) => TCA (S)	1
psbE	214	72	72	CCT (P) => TCT (S)	1
psbF	77	26	26	TCT (S) => TTT (F)	1
psbL	2	1	1	ACG (T) => ATG (M)	1
rpoA	176	59	223	ACT (T) => ATT (I)	1
rpoB	338	113	113	TCT (S) => TTT (F)	1
rpoC1	41	14	14	TCA (S) => TTA (L)	1
rps14	80	27	27	TCA (S) => TTA (L)	1
rps16	212	71	71	TCA (S) => TTA (L)	0.83
	230	77	77	TCT (S) => TTT (F)	1
rps2	182	61	61	GCT (A) => GTT (V)	0.86
	248	83	83	TCA (S) => TTA (L)	1
	266	89	89	ACA (T) => ATA (I)	0.86
Table S5-11. Predicted RNA editing sites in the cp genome of D. hainanensis
Gene	Nucleotide Position	Amino Acid Position	Codon	Conversion	Score
accD	346	116	408	CCA (P) => TCA (S)	0.8
atpF	92	31	31	CCA (P) => CTA (L)	0.86
atpI	76	26	28	CTC (L) => TTC (F)	0.86
ccsA	7	3	3	CTT (L) => TTT (F)	1
	71	24	24	ACT (T) => ATT (I)	1
10 clpP	559	187	187	CAC (H) => TAC (Y)	1
matK	28	10	242	CCA (P) => TCA (S)	1
	445	149	432	CCT (P) => TCT (S)	0.86
ndhA	122	41	62	ACA (T) => ATA (I)	1
	373	125	157	CAT (H) => TAT (Y)	1
	751	251	284	CCT (P) => TCT (S)	1
	980	327	360	TCT (S) => TTT (F)	1
ndhB	14	5	19	ACG (T) => ATG (M)	1
	68	23	50	CCG (P) => CTG (L)	1
	179	60	132	TCT (S) => TTT (F)	1
	209	70	154	GCT (A) => GTT (V)	1
	400	134	272	CCC (P) => TCC (S)	1
	457	153	291	CCC (P) => TCC (S)	0.8
	463	155	306	CCC (P) => TCC (S)	1
	721	241	419	CAT (H) => TAT (Y)	1
	947	316	494	CCA (P) => CTA (L)	1
ndhD	49	17	141	CGG (R) => TGG (W)	1
	307	103	380	CCA (P) => TCA (S)	0.8
ndhF	26	9	11	ACC (T) => ATC (I)	1
ndhG	82	28	38	CCT (P) => TCT (S)	1
	119	40	51	ACA (T) => ATA (I)	0.8
	325	109	121	CAT (H) => TAT (Y)	1
psbE	214	72	72	CCT (P) => TCT (S)	1
psbF	77	26	26	TCT (S) => TTT (F)	1
psbL	2	1	1	ACG (T) => ATG (M)	1
rpoB	338	113	113	TCT (S) => TTT (F)	1
rpoC1	41	14	14	TCA (S) => TTA (L)	1
rps14	80	27	27	TCA (S) => TTA (L)	1
rps16	253	85	85	CTC (L) => TTC (F)	1
rps2	182	61	61	GCT (A) => GTT (V)	0.86
	248	83	83	TCA (S) => TTA (L)	1
	266	89	89	ACA (T) => ATA (I)	0.86
Table S5-12. Predicted RNA editing sites in the cp genome of D. tonkinensis
Gene	Nucleotide Position	Amino Acid Position	Codon	Conversion	Score
accD	346	116	408	CCA (P) => TCA (S)	0.8
atpF	92	31	31	CCA (P) => CTA (L)	0.86
atpI	76	26	28	CTC (L) => TTC (F)	0.86
ccsA	71	24	24	ACT (T) => ATT (I)	1
clpP	559	187	187	CAC (H) => TAC (Y)	1
matK	167	56	305	CCG (P) => CTG (L)	1
	214	72	321	CTC (L) => TTC (F)	0.86
ndhA	122	41	62	ACA (T) => ATA (I)	1
	373	125	157	CAT (H) => TAT (Y)	1
	751	251	284	CCT (P) => TCT (S)	1
	980	327	360	TCT (S) => TTT (F)	1
ndhB	14	5	19	ACG (T) => ATG (M)	1
	68	23	50	CCG (P) => CTG (L)	1
	179	60	132	TCT (S) => TTT (F)	1
	209	70	154	GCT (A) => GTT (V)	1
	400	134	272	CCC (P) => TCC (S)	1
	457	153	291	CCC (P) => TCC (S)	0.8
	463	155	306	CCC (P) => TCC (S)	1
	721	241	419	CAT (H) => TAT (Y)	1
	947	316	494	CCA (P) => CTA (L)	1
ndhF	91	31	124	CTT (L) => TTT (F)	1
	109	37	130	CTT (L) => TTT (F)	1
ndhG	133	45	47	CCC (P) => TCC (S)	1
	149	50	52	CCG (P) => CTG (L)	1
psbE	214	72	72	CCT (P) => TCT (S)	1
psbF	77	26	26	TCT (S) => TTT (F)	1
psbL	2	1	1	ACG (T) => ATG (M)	1
rpoA	176	59	223	ACT (T) => ATT (I)	1
rpoB	338	113	113	TCT (S) => TTT (F)	1
rpoC1	41	14	14	TCA (S) => TTA (L)	1
rps14	80	27	27	TCA (S) => TTA (L)	1
rps16	230	77	77	TCT (S) => TTT (F)	1
rps2	182	61	61	GCT (A) => GTT (V)	0.86
	248	83	83	TCA (S) => TTA (L)	1
Table S5-13. Predicted RNA editing sites in the cp genome of D. odorifera
Gene	Nucleotide Position	Amino Acid Position	Codon	Conversion	Score
accD	346	116	408	CCA (P) => TCA (S)	0.8
atpF	92	31	31	CCA (P) => CTA (L)	0.86
atpI	76	26	28	CTC (L) => TTC (F)	0.86
ccsA	71	24	24	ACT (T) => ATT (I)	1
clpP	559	187	187	CAC (H) => TAC (Y)	1
matK	167	56	305	CCG (P) => CTG (L)	1
	214	72	321	CTC (L) => TTC (F)	0.86
ndhA	122	41	62	ACA (T) => ATA (I)	1
	373	125	157	CAT (H) => TAT (Y)	1
	751	251	284	CCT (P) => TCT (S)	1
	980	327	360	TCT (S) => TTT (F)	1
ndhB	14	5	19	ACG (T) => ATG (M)	1
	68	23	50	CCG (P) => CTG (L)	1
	179	60	132	TCT (S) => TTT (F)	1
	209	70	154	GCT (A) => GTT (V)	1
	400	134	272	CCC (P) => TCC (S)	1
	457	153	291	CCC (P) => TCC (S)	0.8
	463	155	306	CCC (P) => TCC (S)	1
	721	241	419	CAT (H) => TAT (Y)	1
	947	316	494	CCA (P) => CTA (L)	1
ndhF	73	25	124	CTT (L) => TTT (F)	1
	91	31	130	CTT (L) => TTT (F)	1
ndhG	133	45	47	CCC (P) => TCC (S)	1
	149	50	52	CCG (P) => CTG (L)	1
psbE	214	72	72	CCT (P) => TCT (S)	1
psbF	77	26	26	TCT (S) => TTT (F)	1
psbL	2	1	1	ACG (T) => ATG (M)	1
rpoA	176	59	223	ACT (T) => ATT (I)	1
rpoB	338	113	113	TCT (S) => TTT (F)	1
rpoC1	41	14	14	TCA (S) => TTA (L)	1
rps14	80	27	27	TCA (S) => TTA (L)	1
rps16	230	77	77	TCT (S) => TTT (F)	1
rps2	182	61	61	GCT (A) => GTT (V)	0.86
	248	83	83	TCA (S) => TTA (L)	1
Table S5-14. Predicted RNA editing sites in the cp genome of D. armata
Gene	Nucleotide Position	Amino Acid Position	Codon	Conversion	Score
accD	346	116	408	CCA (P) => TCA (S)	0.8
atpF	92	31	31	CCA (P) => CTA (L)	0.86
atpI	76	26	28	CTC (L) => TTC (F)	0.86
ccsA	7	3	3	CTT (L) => TTT (F)	1
	71	24	24	ACT (T) => ATT (I)	1
clpP	559	187	188	CAC (H) => TAC (Y)	1
matK	167	56	305	CCG (P) => CTG (L)	1
	214	72	321	CTC (L) => TTC (F)	0.86
ndhA	418	140	171	CCT (P) => TCT (S)	1
	751	251	283	CCT (P) => TCT (S)	1
	980	327	359	TCT (S) => TTT (F)	1
ndhB	14	5	19	ACG (T) => ATG (M)	1
	68	23	50	CCG (P) => CTG (L)	1
	179	60	132	TCT (S) => TTT (F)	1
	209	70	154	GCT (A) => GTT (V)	1
	400	134	272	CCC (P) => TCC (S)	1
	457	153	291	CCC (P) => TCC (S)	0.8
	463	155	306	CCC (P) => TCC (S)	1
	721	241	419	CAT (H) => TAT (Y)	1
	947	316	494	CCA (P) => CTA (L)	1
ndhD	49	17	141	CGG (R) => TGG (W)	1
	307	103	380	CCA (P) => TCA (S)	0.8
ndhG	133	45	47	CCC (P) => TCC (S)	1
	149	50	52	CCG (P) => CTG (L)	1
psbE	214	72	72	CCT (P) => TCT (S)	1
psbF	77	26	26	TCT (S) => TTT (F)	1
psbL	2	1	1	ACG (T) => ATG (M)	1
rpoB	338	113	113	TCT (S) => TTT (F)	1
rpoC1	41	14	14	TCA (S) => TTA (L)	1
rps16	212	71	71	TCA (S) => TTA (L)	0.83
	230	77	77	TCT (S) => TTT (F)	1
rps2	182	61	61	GCT (A) => GTT (V)	0.86
	248	83	83	TCA (S) => TTA (L)	1
Table S5-15. Predicted RNA editing sites in the cp genome of D. cearensis
Gene	Nucleotide Position	Amino Acid Position	Codon	Conversion	Score
accD	346	116	408	CCA (P) => TCA (S)	0.8
atpF	92	31	31	CCA (P) => CTA (L)	0.86
atpI	76	26	28	CTC (L) => TTC (F)	0.86
ccsA	7	3	3	CTT (L) => TTT (F)	1
	71	24	24	ACT (T) => ATT (I)	1
clpP	562	188	188	CAC (H) => TAC (Y)	1
matK	137	46	305	CCG (P) => CTG (L)	1
	184	62	321	CTC (L) => TTC (F)	0.86
ndhA	418	140	158	CCT (P) => TCT (S)	1
	751	251	283	CCT (P) => TCT (S)	1
	980	327	359	TCT (S) => TTT (F)	1
ndhB	14	5	19	ACG (T) => ATG (M)	1
	68	23	50	CCG (P) => CTG (L)	1
	179	60	132	TCT (S) => TTT (F)	1
	209	70	154	GCT (A) => GTT (V)	1
	400	134	272	CCC (P) => TCC (S)	1
	457	153	291	CCC (P) => TCC (S)	0.8
	463	155	306	CCC (P) => TCC (S)	1
	721	241	419	CAT (H) => TAT (Y)	1
	947	316	494	CCA (P) => CTA (L)	1
ndhD	307	103	379	CCA (P) => TCA (S)	0.8
ndhF	88	30	124	CTT (L) => TTT (F)	1
	106	36	130	CTT (L) => TTT (F)	1
ndhG	82	28	38	CCT (P) => TCT (S)	1
	119	40	51	ACA (T) => ATA (I)	0.8
	325	109	121	CAT (H) => TAT (Y)	1
psbE	214	72	72	CCT (P) => TCT (S)	1
psbF	77	26	26	TCT (S) => TTT (F)	1
psbL	2	1	1	ACG (T) => ATG (M)	1
rpoB	338	113	113	TCT (S) => TTT (F)	1
rpoC1	41	14	14	TCA (S) => TTA (L)	1
rps14	80	27	27	TCA (S) => TTA (L)	1
rps16	212	71	71	TCA (S) => TTA (L)	0.83
	230	77	77	TCT (S) => TTT (F)	1
rps2	182	61	61	GCT (A) => GTT (V)	0.86
	248	83	83	TCA (S) => TTA (L)	1
Table S5-16. Predicted RNA editing sites in the cp genome of D. chlorocarpa
Gene	Nucleotide Position	Amino Acid Position	Codon	Conversion	Score
accD	346	116	408	CCA (P) => TCA (S)	0.8
atpF	92	31	31	CCA (P) => CTA (L)	0.86
atpI	76	26	28	CTC (L) => TTC (F)	0.86
ccsA	7	3	3	CTT (L) => TTT (F)	1
	71	24	24	ACT (T) => ATT (I)	1
clpP	562	188	188	CAC (H) => TAC (Y)	1
matK	167	56	305	CCG (P) => CTG (L)	1
	214	72	321	CTC (L) => TTC (F)	0.86
ndhA	256	86	112	CCA (P) => TCA (S)	1
	751	251	282	CCT (P) => TCT (S)	1
	980	327	358	TCT (S) => TTT (F)	1
ndhB	14	5	19	ACG (T) => ATG (M)	1
	68	23	50	CCG (P) => CTG (L)	1
	233	78	134	CCA (P) => CTA (L)	1
	400	134	272	CCC (P) => TCC (S)	1
	457	153	291	CCC (P) => TCC (S)	0.8
	463	155	306	CCC (P) => TCC (S)	1
	721	241	419	CAT (H) => TAT (Y)	1
	947	316	494	CCA (P) => CTA (L)	1
ndhD	49	17	141	CGG (R) => TGG (W)	1
ndhF	130	44	284	CTT (L) => TTT (F)	1
ndhG	133	45	47	CCC (P) => TCC (S)	1
	149	50	52	CCG (P) => CTG (L)	1
psbE	214	72	72	CCT (P) => TCT (S)	1
psbF	77	26	26	TCT (S) => TTT (F)	1
psbL	2	1	1	ACG (T) => ATG (M)	1
rpoA	176	59	223	ACT (T) => ATT (I)	1
RPOB	338	113	113	TCT (S) => TTT (F)	1
rpoC1	41	14	14	TCA (S) => TTA (L)	1
rps14	80	27	27	TCA (S) => TTA (L)	1
rps16	212	71	71	TCA (S) => TTA (L)	0.83
	230	77	77	TCT (S) => TTT (F)	1
rps2	182	61	61	GCT (A) => GTT (V)	0.86
	248	83	83	TCA (S) => TTA (L)	1
Table S5-17. Predicted RNA editing sites in the cp genome of D. vietnamensis
Gene	Nucleotide Position	Amino Acid Position	Codon	Conversion	Score
accD	346	116	408	CCA (P) => TCA (S)	0.8
atpF	92	31	31	CCA (P) => CTA (L)	0.86
atpI	76	26	28	CTC (L) => TTC (F)	0.86
ccsA	71	24	24	ACT (T) => ATT (I)	1
clpP	556	186	187	CAC (H) => TAC (Y)	1
matK	167	56	305	CCG (P) => CTG (L)	1
	214	72	321	CTC (L) => TTC (F)	0.86
ndhA	122	41	62	ACA (T) => ATA (I)	1
	373	125	157	CAT (H) => TAT (Y)	1
	751	251	284	CCT (P) => TCT (S)	1
	980	327	360	TCT (S) => TTT (F)	1
ndhB	14	5	19	ACG (T) => ATG (M)	1
	68	23	50	CCG (P) => CTG (L)	1
	179	60	132	TCT (S) => TTT (F)	1
	209	70	154	GCT (A) => GTT (V)	1
	400	134	272	CCC (P) => TCC (S)	1
	457	153	291	CCC (P) => TCC (S)	0.8
	463	155	306	CCC (P) => TCC (S)	1
	721	241	419	CAT (H) => TAT (Y)	1
	947	316	494	CCA (P) => CTA (L)	1
ndhD	49	17	141	CGG (R) => TGG (W)	1
ndhF	88	30	124	CTT (L) => TTT (F)	1
	106	36	130	CTT (L) => TTT (F)	1
ndhG	133	45	47	CCC (P) => TCC (S)	1
	149	50	52	CCG (P) => CTG (L)	1
psbE	214	72	72	CCT (P) => TCT (S)	1
psbF	77	26	26	TCT (S) => TTT (F)	1
psbL	2	1	1	ACG (T) => ATG (M)	1
rpoA	176	59	223	ACT (T) => ATT (I)	1
RPOB	338	113	113	TCT (S) => TTT (F)	1
rpoC1	41	14	14	TCA (S) => TTA (L)	1
rps14	80	27	27	TCA (S) => TTA (L)	1
rps16	212	71	71	TCA (S) => TTA (L)	0.83
	230	77	77	TCT (S) => TTT (F)	1
rps2	182	61	61	GCT (A) => GTT (V)	0.86
	248	83	83	TCA (S) => TTA (L)	1
Table S5-18. Predicted RNA editing sites in the cp genome of D. frutescens
Gene	Nucleotide Position	Amino Acid Position	Codon	Conversion	Score
accD	346	116	408	CCA (P) => TCA (S)	0.8
atpF	92	31	31	CCA (P) => CTA (L)	0.86
atpI	76	26	28	CTC (L) => TTC (F)	0.86
ccsA	7	3	3	CTT (L) => TTT (F)	1
	71	24	24	ACT (T) => ATT (I)	1
clpP	556	186	187	CAC (H) => TAC (Y)	1
matK	167	56	305	CCG (P) => CTG (L)	1
	214	72	321	CTC (L) => TTC (F)	0.86
ndhA	418	140	158	CCT (P) => TCT (S)	1
	751	251	283	CCT (P) => TCT (S)	1
	980	327	359	TCT (S) => TTT (F)	1
ndhB	14	5	19	ACG (T) => ATG (M)	1
	68	23	50	CCG (P) => CTG (L)	1
	179	60	132	TCT (S) => TTT (F)	1
	209	70	154	GCT (A) => GTT (V)	1
	400	134	272	CCC (P) => TCC (S)	1
	457	153	291	CCC (P) => TCC (S)	0.8
	463	155	306	CCC (P) => TCC (S)	1
	721	241	419	CAT (H) => TAT (Y)	1
	947	316	494	CCA (P) => CTA (L)	1
ndhD	49	17	141	CGG (R) => TGG (W)	1
	307	103	380	CCA (P) => TCA (S)	0.8
ndhF	73	25	124	CTT (L) => TTT (F)	1
	91	31	130	CTT (L) => TTT (F)	1
	215	72	189	TCA (S) => TTA (L)	1
	221	74	191	TCA (S) => TTA (L)	1
ndhG	82	28	38	CCT (P) => TCT (S)	1
	119	40	51	ACA (T) => ATA (I)	0.8
psbE	214	72	72	CCT (P) => TCT (S)	1
psbF	77	26	26	TCT (S) => TTT (F)	1
psbL	2	1	1	ACG (T) => ATG (M)	1
rpoA	176	59	223	ACT (T) => ATT (I)	1
RPOB	338	113	113	TCT (S) => TTT (F)	1
rpoC1	41	14	14	TCA (S) => TTA (L)	1
rps14	80	27	27	TCA (S) => TTA (L)	1
rps16	212	71	71	TCA (S) => TTA (L)	0.83
	230	77	77	TCT (S) => TTT (F)	1
rps2	182	61	61	GCT (A) => GTT (V)	0.86
	248	83	83	TCA (S) => TTA (L)	1
Table S5-19. Predicted RNA editing sites in the cp genome of D. martinii
Gene	Nucleotide Position	Amino Acid Position	Codon	Conversion	Score
accD	346	116	408	CCA (P) => TCA (S)	0.8
atpF	92	31	31	CCA (P) => CTA (L)	0.86
atpI	76	26	28	CTC (L) => TTC (F)	0.86
ccsA	7	3	3	CTT (L) => TTT (F)	1
	71	24	24	ACT (T) => ATT (I)	1
clpP	559	187	187	CAC (H) => TAC (Y)	1
matK	167	56	305	CCG (P) => CTG (L)	1
	214	72	321	CTC (L) => TTC (F)	0.86
ndhA	418	140	158	CCT (P) => TCT (S)	1
	751	251	283	CCT (P) => TCT (S)	1
	980	327	359	TCT (S) => TTT (F)	1
ndhB	14	5	19	ACG (T) => ATG (M)	1
	68	23	50	CCG (P) => CTG (L)	1
	179	60	132	TCT (S) => TTT (F)	1
	209	70	154	GCT (A) => GTT (V)	1
	400	134	272	CCC (P) => TCC (S)	1
	457	153	291	CCC (P) => TCC (S)	0.8
	463	155	306	CCC (P) => TCC (S)	1
	721	241	419	CAT (H) => TAT (Y)	1
	947	316	494	CCA (P) => CTA (L)	1
ndhD	49	17	141	CGG (R) => TGG (W)	1
ndhF	73	25	124	CTT (L) => TTT (F)	1
	91	31	130	CTT (L) => TTT (F)	1
ndhG	133	45	47	CCC (P) => TCC (S)	1
	149	50	52	CCG (P) => CTG (L)	1
psbE	214	72	72	CCT (P) => TCT (S)	1
psbF	77	26	26	TCT (S) => TTT (F)	1
psbL	2	1	1	ACG (T) => ATG (M)	1
rpoA	187	63	200	CTT (L) => TTT (F)	1
	199	67	204	CGG (R) => TGG (W)	1
RPOB	338	113	113	TCT (S) => TTT (F)	1
rpoC1	41	14	14	TCA (S) => TTA (L)	1
rps14	80	27	27	TCA (S) => TTA (L)	1
rps16	212	71	71	TCA (S) => TTA (L)	0.83
	230	77	77	TCT (S) => TTT (F)	1
rps2	182	61	61	GCT (A) => GTT (V)	0.86
	248	83	83	TCA (S) => TTA (L)	1
Table S5-20. Predicted RNA editing sites in the cp genome of D.obovata
Gene	Nucleotide Position	Amino Acid Position	Codon	Conversion	Score
accD	346	116	408	CCA (P) => TCA (S)	0.8
atpF	92	31	31	CCA (P) => CTA (L)	0.86
atpI	76	26	28	CTC (L) => TTC (F)	0.86
ccsA	7	3	3	CTT (L) => TTT (F)	1
	71	24	24	ACT (T) => ATT (I)	1
clpP	556	186	187	CAC (H) => TAC (Y)	1
matK	167	56	305	CCG (P) => CTG (L)	1
	214	72	321	CTC (L) => TTC (F)	0.86
ndhA	418	140	158	CCT (P) => TCT (S)	1
	751	251	283	CCT (P) => TCT (S)	1
	980	327	359	TCT (S) => TTT (F)	1
ndhB	14	5	19	ACG (T) => ATG (M)	1
	68	23	50	CCG (P) => CTG (L)	1
	179	60	132	TCT (S) => TTT (F)	1
	209	70	154	GCT (A) => GTT (V)	1
	400	134	272	CCC (P) => TCC (S)	1
	457	153	291	CCC (P) => TCC (S)	0.8
	463	155	306	CCC (P) => TCC (S)	1
	721	241	419	CAT (H) => TAT (Y)	1
	947	316	494	CCA (P) => CTA (L)	1
ndhD	49	17	141	CGG (R) => TGG (W)	1
ndhF	85	29	124	CTT (L) => TTT (F)	1
	103	35	130	CTT (L) => TTT (F)	1
ndhG	133	45	47	CCC (P) => TCC (S)	1
	149	50	52	CCG (P) => CTG (L)	1
psbE	214	72	72	CCT (P) => TCT (S)	1
psbF	77	26	26	TCT (S) => TTT (F)	1
psbL	2	1	1	ACG (T) => ATG (M)	1
rpoA	176	59	223	ACT (T) => ATT (I)	1
RPOB	338	113	113	TCT (S) => TTT (F)	1
rpoC1	41	14	14	TCA (S) => TTA (L)	1
rps14	80	27	27	TCA (S) => TTA (L)	1
rps16	212	71	71	TCA (S) => TTA (L)	0.83
	230	77	77	TCT (S) => TTT (F)	1
rps2	182	61	61	GCT (A) => GTT (V)	0.86
	248	83	83	TCA (S) => TTA (L)	1
Table S5-21. Predicted RNA editing sites in the cp genome of D. yunnanensis
Gene	Nucleotide Position	Amino Acid Position	Codon	Conversion	Score
accD	346	116	408	CCA (P) => TCA (S)	0.8
atpF	92	31	31	CCA (P) => CTA (L)	0.86
atpI	76	26	28	CTC (L) => TTC (F)	0.86
ccsA	71	24	24	ACT (T) => ATT (I)	1
clpP	559	187	187	CAC (H) => TAC (Y)	1
matK	401	134	408	CCT (P) => CTT (L)	0.86
ndhA	122	41	62	ACA (T) => ATA (I)	1
	373	125	157	CAT (H) => TAT (Y)	1
	751	251	284	CCT (P) => TCT (S)	1
	980	327	360	TCT (S) => TTT (F)	1
ndhB	14	5	19	ACG (T) => ATG (M)	1
	68	23	50	CCG (P) => CTG (L)	1
	179	60	132	TCT (S) => TTT (F)	1
	209	70	154	GCT (A) => GTT (V)	1
	400	134	272	CCC (P) => TCC (S)	1
	457	153	291	CCC (P) => TCC (S)	0.8
	463	155	306	CCC (P) => TCC (S)	1
	721	241	419	CAT (H) => TAT (Y)	1
	947	316	494	CCA (P) => CTA (L)	1
ndhD	49	17	141	CGG (R) => TGG (W)	1
ndhF	91	31	124	CTT (L) => TTT (F)	1
	109	37	130	CTT (L) => TTT (F)	1
ndhG	133	45	47	CCC (P) => TCC (S)	1
	149	50	52	CCG (P) => CTG (L)	1
psbE	214	72	72	CCT (P) => TCT (S)	1
psbF	77	26	26	TCT (S) => TTT (F)	1
psbL	2	1	1	ACG (T) => ATG (M)	1
rpoA	338	113	113	TCT (S) => TTT (F)	1
RPOB	41	14	14	TCA (S) => TTA (L)	1
rps14	80	27	27	TCA (S) => TTA (L)	1
rps16	104	35	71	TCA (S) => TTA (L)	0.83
	122	41	77	TCT (S) => TTT (F)	1
rps2	182	61	61	GCT (A) => GTT (V)	0.86
	248	83	83	TCA (S) => TTA (L)	1
